# Supplementary material
Source: PubMed Central journal article supplement (PMC5520424)

**S1:** Pairwise PERMANOVA tests for significant difference of beta-diversity measures (Bray-Curtis) between baseline and 12 months for each group of site-specific plaque samples.

| <b>Sample</b> | <b>Baseline (N)</b> | <b>12 months (N)</b> | <b>Test statistic</b> | <b><i>P</i>-value</b> |
|---------------|---------------------|----------------------|-----------------------|-----------------------|
| CF-PF         | 25                  | 20                   | 0.9993                | 0.4309                |
| CAE-PF        | 15                  | 19                   | 1.0834                | 0.3536                |
| CAE-PE        | 20                  | 14                   | 0.6210                | 0.8577                |
| CA-PF         | 13                  | 14                   | 0.9299                | 0.5099                |
| CA-PE         | 11                  | 13                   | 1.0841                | 0.3549                |
| CA-PD         | 13                  | 7                    | 1.8017                | 0.0846                |

CF: caries-free children; CAE: caries-active, with enamel carious lesions, children; CA: caries-active, with dentin carious lesions, children; PF: supragingival plaque samples from caries-free tooth surfaces; PE: plaque from active, enamel carious lesion; PD: plaque from active, dentin carious lesions; N: number of plaque samples.

**S2:** Taxa/OTUs with significant differences in abundance among the plaque groups.

| OTU                                  | Test-Statistic | P    | FDR_P | Bonferroni_P | CF-PF mean | CAE-PF mean | CA-PF, CAE-PE, CA-PE mean | CA-PD mean |
|--------------------------------------|----------------|------|-------|--------------|------------|-------------|---------------------------|------------|
| Streptococcus Genus probe 4 GP-081   | 19.62          | 0.00 | 0.00  | 0.10         | 5037.82    | 7440.94     | 4935.02                   | 3684.00    |
| Neisseria Genus probe 2 GP-060       | 18.68          | 0.00 | 0.00  | 0.16         | 4417.78    | 2126.32     | 2189.22                   | 1805.58    |
| Streptococcus sanguinis ST-20        | 13.46          | 0.00 | 0.02  | 1.00         | 2230.76    | 1859.27     | 1682.98                   | 913.21     |
| Lautropia mirabilis LA-29            | 18.14          | 0.00 | 0.01  | 0.20         | 1873.60    | 1493.00     | 1098.88                   | 358.47     |
| Veillonella dispar VE-03             | 19.51          | 0.00 | 0.00  | 0.11         | 648.09     | 942.53      | 1165.90                   | 1830.32    |
| Veillonella Genus probe 2 GP-089     | 24.64          | 0.00 | 0.00  | 0.01         | 292.07     | 899.15      | 699.64                    | 1080.11    |
| Streptococcus mutans ST-15           | 77.54          | 0.00 | 0.00  | 0.00         | 33.80      | 15.44       | 121.62                    | 5165.11    |
| Haemophilus parainfluenzae HA-05     | 15.47          | 0.00 | 0.01  | 0.72         | 946.44     | 480.82      | 440.99                    | 421.26     |
| Leptotrichia wadei LE-22             | 11.32          | 0.01 | 0.05  | 1.00         | 319.31     | 309.47      | 677.91                    | 501.21     |
| Actinomyces naeslundii AC-36         | 11.92          | 0.01 | 0.04  | 1.00         | 623.38     | 417.91      | 469.14                    | 413.32     |
| Corynebacterium durum CO-02          | 12.15          | 0.01 | 0.04  | 1.00         | 688.11     | 623.79      | 361.99                    | 284.32     |
| Gemella Genus probe GP-039           | 17.13          | 0.00 | 0.01  | 0.33         | 229.87     | 411.82      | 559.21                    | 139.26     |
| Rothia aerea RO-01                   | 18.96          | 0.00 | 0.00  | 0.14         | 566.09     | 537.77      | 299.41                    | 160.00     |
| Leptotrichia sp oral taxon 498 LE-19 | 11.52          | 0.01 | 0.04  | 1.00         | 60.58      | 122.12      | 322.77                    | 675.74     |
| Gemella morbillorum GE-05            | 13.55          | 0.00 | 0.02  | 1.00         | 88.96      | 179.88      | 312.83                    | 78.90      |
| Gemella haemolysans GE-02            | 11.58          | 0.01 | 0.04  | 1.00         | 102.22     | 260.68      | 254.05                    | 112.00     |
| Gemella morbillorum GE-03            | 11.76          | 0.01 | 0.04  | 1.00         | 108.22     | 235.12      | 216.69                    | 62.68      |
| Bergeyella sp oral taxon 322 BE-02   | 20.92          | 0.00 | 0.00  | 0.05         | 202.47     | 272.65      | 145.33                    | 51.37      |
| Cardiobacterium hominis CA-31        | 14.08          | 0.00 | 0.02  | 1.00         | 185.36     | 146.32      | 159.26                    | 92.95      |
| TM7[G-1] sp oral taxon 348 TM-13     | 12.26          | 0.01 | 0.04  | 1.00         | 148.16     | 284.97      | 132.85                    | 27.42      |
| Neisseria pharyngis NE-08            | 16.43          | 0.00 | 0.01  | 0.46         | 293.40     | 56.18       | 110.61                    | 4.95       |
| TM7 Genus probe GP-083               | 17.68          | 0.00 | 0.01  | 0.25         | 65.67      | 186.29      | 148.81                    | 65.79      |
| Leptotrichia sp oral taxon 392 LE-15 | 12.01          | 0.01 | 0.04  | 1.00         | 101.53     | 71.97       | 170.50                    | 47.37      |
| Streptococcus intermedius ST-14      | 18.19          | 0.00 | 0.01  | 0.20         | 50.60      | 115.62      | 149.22                    | 53.74      |
| Veillonella parvula VE-06            | 34.02          | 0.00 | 0.00  | 0.00         | 27.93      | 86.91       | 92.15                     | 390.68     |
| Actinomyces massiliensis AC-11       | 16.49          | 0.00 | 0.01  | 0.44         | 101.07     | 125.71      | 114.71                    | 34.00      |
| Campylobacter gracilis CA-04         | 18.39          | 0.00 | 0.01  | 0.18         | 63.16      | 42.88       | 139.71                    | 119.47     |
| Fusobacterium Genus probe 3 GP-096   | 12.70          | 0.01 | 0.03  | 1.00         | 116.02     | 98.44       | 106.63                    | 38.58      |
| Corynebacterium Genus probe GP-025   | 11.21          | 0.01 | 0.05  | 1.00         | 98.13      | 146.21      | 77.56                     | 53.00      |

|                                      |       |      |      |      |       |        |        |        |
|--------------------------------------|-------|------|------|------|-------|--------|--------|--------|
| Actinomyces gerencseriae AC-07       | 19.36 | 0.00 | 0.00 | 0.11 | 24.13 | 104.35 | 125.73 | 82.74  |
| Scardovia wiggsiae SC-02             | 54.09 | 0.00 | 0.00 | 0.00 | 0.20  | 5.85   | 2.20   | 834.84 |
| Lachnoanaerobaculum saburreum LA-02  | 22.27 | 0.00 | 0.00 | 0.03 | 39.33 | 44.53  | 126.63 | 107.42 |
| Granulicatella elegans GR-02         | 11.60 | 0.01 | 0.04 | 1.00 | 59.84 | 83.12  | 101.81 | 42.00  |
| Parascardovia denticolens PA-02      | 42.38 | 0.00 | 0.00 | 0.00 | 0.02  | 0.53   | 0.88   | 655.74 |
| Prevotella oris PR-20                | 11.09 | 0.01 | 0.05 | 1.00 | 23.67 | 32.79  | 76.47  | 99.68  |
| Tannerella sp oral taxon 286 TA-02   | 14.92 | 0.00 | 0.01 | 0.93 | 45.36 | 45.97  | 72.22  | 12.95  |
| Eikenella corrodens EI-01            | 11.58 | 0.01 | 0.04 | 1.00 | 42.24 | 65.77  | 64.06  | 19.37  |
| Prevotella oulorum PR-21             | 22.55 | 0.00 | 0.00 | 0.03 | 9.87  | 38.15  | 83.08  | 43.53  |
| TM7[G-1] sp oral taxon 348 TM-03     | 17.67 | 0.00 | 0.01 | 0.25 | 0.20  | 22.77  | 99.16  | 14.47  |
| Lactobacillus salivarius LA-25       | 43.61 | 0.00 | 0.00 | 0.00 | 0.00  | 0.06   | 0.59   | 487.42 |
| Prevotella Genus probe 2 GP-069      | 18.58 | 0.00 | 0.00 | 0.16 | 20.89 | 21.97  | 57.69  | 83.90  |
| Fusobacterium Genus probe 2 GP-095   | 13.37 | 0.00 | 0.03 | 1.00 | 23.00 | 38.77  | 52.91  | 39.16  |
| Actinomyces johnsonii AC-10          | 18.92 | 0.00 | 0.00 | 0.14 | 35.49 | 100.35 | 24.15  | 3.05   |
| Actinomyces naeslundii AC-13         | 13.40 | 0.00 | 0.03 | 1.00 | 5.29  | 2.56   | 61.44  | 76.47  |
| Leptotrichia goodfellowii LE-04      | 11.22 | 0.01 | 0.05 | 1.00 | 46.04 | 29.18  | 29.81  | 12.37  |
| Prevotella denticola PR-06           | 18.56 | 0.00 | 0.00 | 0.17 | 1.42  | 22.44  | 22.23  | 154.37 |
| Campylobacter Genus probe 2 GP-019   | 16.36 | 0.00 | 0.01 | 0.47 | 23.67 | 16.44  | 39.40  | 34.53  |
| Atopobium rimae AT-03                | 12.62 | 0.01 | 0.03 | 1.00 | 0.91  | 16.24  | 30.66  | 118.95 |
| Dialister invisus DI-01              | 14.95 | 0.00 | 0.01 | 0.91 | 8.09  | 20.94  | 36.41  | 55.84  |
| Aggregatibacter paraphrophilus AG-09 | 14.15 | 0.00 | 0.02 | 1.00 | 16.93 | 45.18  | 30.41  | 1.37   |
| Atopobium parvulum AT-02             | 16.49 | 0.00 | 0.01 | 0.44 | 15.96 | 3.27   | 5.16   | 192.11 |
| Selenomonas sputigena SE-18          | 15.70 | 0.00 | 0.01 | 0.64 | 8.44  | 40.03  | 32.57  | 18.21  |
| Parvimonas sp oral taxon 110 PA-04   | 14.51 | 0.00 | 0.02 | 1.00 | 68.20 | 29.94  | 7.67   | 0.05   |
| SR1[G-1] sp oral taxon 874 SR-02     | 16.10 | 0.00 | 0.01 | 0.53 | 22.98 | 24.38  | 26.33  | 2.16   |
| Ottowia sp oral taxon 894 OT-02      | 29.03 | 0.00 | 0.00 | 0.00 | 28.27 | 65.91  | 6.43   | 0.00   |
| Olsenella profusa OL-01              | 12.39 | 0.01 | 0.04 | 1.00 | 0.00  | 0.09   | 0.65   | 186.53 |
| Capnocytophaga Genus probe 3 GP-021  | 16.11 | 0.00 | 0.01 | 0.53 | 7.47  | 26.03  | 25.49  | 9.37   |
| Peptostreptococcus stomatis PE-21    | 12.12 | 0.01 | 0.04 | 1.00 | 15.07 | 11.09  | 22.64  | 13.26  |
| Streptococcus anginosus ST-09        | 24.55 | 0.00 | 0.00 | 0.01 | 1.42  | 19.74  | 26.38  | 11.79  |
| Prevotella sp oral taxon 317 PR-73   | 11.25 | 0.01 | 0.05 | 1.00 | 23.31 | 6.97   | 17.85  | 15.21  |
| Lactobacillus Genus probe 1 GP-115   | 28.88 | 0.00 | 0.00 | 0.00 | 0.00  | 0.06   | 0.21   | 162.16 |
| Veillonella atypica VE-21            | 18.55 | 0.00 | 0.00 | 0.17 | 4.56  | 2.27   | 26.55  | 23.90  |
| Prevotella salivae PR-25             | 23.59 | 0.00 | 0.00 | 0.02 | 2.27  | 3.09   | 25.99  | 20.68  |

|                                              |       |      |      |      |       |       |       |        |
|----------------------------------------------|-------|------|------|------|-------|-------|-------|--------|
| Lactobacillus Genus probe 3 GP-046           | 17.22 | 0.00 | 0.01 | 0.31 | 0.87  | 0.97  | 0.87  | 139.79 |
| Veillonella atypica VE-20                    | 11.60 | 0.01 | 0.04 | 1.00 | 2.82  | 3.62  | 25.35 | 17.63  |
| Oribacterium Genus probe GP-120              | 12.62 | 0.01 | 0.03 | 1.00 | 7.87  | 9.47  | 19.06 | 23.32  |
| Aggregatibacter paraphrophilus AG-03         | 11.18 | 0.01 | 0.05 | 1.00 | 42.24 | 21.35 | 1.13  | 0.00   |
| Lachnoanaerobaculum orale LA-01              | 18.83 | 0.00 | 0.00 | 0.15 | 2.13  | 10.82 | 18.40 | 17.32  |
| Selenomonas Genus probe 1 GP-122             | 15.55 | 0.00 | 0.01 | 0.69 | 5.96  | 7.56  | 15.09 | 10.74  |
| Prevotella maculosa PR-12                    | 24.24 | 0.00 | 0.00 | 0.01 | 4.24  | 5.59  | 15.66 | 10.58  |
| Streptococcus sp oral taxon 064 ST-22        | 11.89 | 0.01 | 0.04 | 1.00 | 9.22  | 13.88 | 9.97  | 8.47   |
| Campylobacter concisus CA-02                 | 20.50 | 0.00 | 0.00 | 0.07 | 5.44  | 3.12  | 12.64 | 14.79  |
| Actinomyces meyeri AC-12                     | 17.10 | 0.00 | 0.01 | 0.33 | 12.18 | 9.03  | 7.35  | 4.53   |
| Stomatobaculum longum ST-04                  | 13.11 | 0.00 | 0.03 | 1.00 | 1.98  | 2.68  | 11.05 | 15.05  |
| Streptococcus sp oral taxon 066 ST-23        | 14.39 | 0.00 | 0.02 | 1.00 | 6.80  | 10.68 | 6.49  | 5.79   |
| Streptococcus parasanguinis II ST-16         | 11.95 | 0.01 | 0.04 | 1.00 | 6.33  | 9.77  | 6.78  | 6.05   |
| Streptococcus sp oral taxon 431 ST-26        | 11.58 | 0.01 | 0.04 | 1.00 | 6.04  | 8.97  | 7.14  | 4.74   |
| Atopobium Genus probe GP-009                 | 18.84 | 0.00 | 0.00 | 0.15 | 3.20  | 1.21  | 3.83  | 35.95  |
| Lachnoanaerobaculum Genus probe GP-044       | 14.22 | 0.00 | 0.02 | 1.00 | 6.11  | 2.15  | 8.38  | 4.79   |
| Lachnospiraceae[G-3] sp oral taxon 100 LA-31 | 11.08 | 0.01 | 0.05 | 1.00 | 4.07  | 3.97  | 9.27  | 1.47   |
| Tannerella Genus probe GP-082                | 13.92 | 0.00 | 0.02 | 1.00 | 12.80 | 2.44  | 4.40  | 0.74   |
| SR1 Genus probe GP-079                       | 11.27 | 0.01 | 0.05 | 1.00 | 4.80  | 5.79  | 7.10  | 1.05   |
| TM7[G-5] sp oral taxon 437 TM-12             | 13.83 | 0.00 | 0.02 | 1.00 | 0.00  | 0.03  | 9.88  | 5.95   |
| Megasphaera micronuciformis ME-01            | 24.89 | 0.00 | 0.00 | 0.01 | 0.16  | 0.38  | 5.16  | 23.74  |
| Scardovia Genus probe GP-075                 | 46.24 | 0.00 | 0.00 | 0.00 | 0.02  | 0.29  | 0.09  | 40.00  |
| Neisseria bacilliformis NE-01                | 23.97 | 0.00 | 0.00 | 0.01 | 7.84  | 2.24  | 3.40  | 1.53   |
| Selenomonas sp oral taxon 149 SE-13          | 23.22 | 0.00 | 0.00 | 0.02 | 0.31  | 2.91  | 5.85  | 5.74   |
| Cryptobacterium curtum CR-01                 | 47.95 | 0.00 | 0.00 | 0.00 | 0.02  | 1.82  | 0.65  | 28.00  |
| Lactobacillus fermentum LA-18                | 55.95 | 0.00 | 0.00 | 0.00 | 0.00  | 0.00  | 0.05  | 29.95  |
| TM7[G-3] sp oral taxon 351 TM-09             | 23.57 | 0.00 | 0.00 | 0.02 | 0.29  | 3.06  | 5.01  | 0.63   |
| Capnocytophaga sp oral taxon 336 CA-20       | 14.18 | 0.00 | 0.02 | 1.00 | 1.20  | 1.35  | 4.13  | 4.32   |
| Scardovia inopinata SC-01                    | 16.07 | 0.00 | 0.01 | 0.54 | 0.00  | 0.09  | 0.27  | 23.05  |
| Selenomonas Genus probe 2 GP-123             | 12.21 | 0.01 | 0.04 | 1.00 | 1.11  | 0.59  | 4.12  | 2.11   |
| Lactobacillus vaginalis LA-27                | 18.80 | 0.00 | 0.00 | 0.15 | 0.00  | 0.00  | 0.03  | 23.68  |
| Neisseria meningitidis NE-06                 | 11.25 | 0.01 | 0.05 | 1.00 | 3.91  | 1.74  | 2.05  | 1.42   |
| Veillonella Genus probe 1 GP-130             | 19.78 | 0.00 | 0.00 | 0.09 | 0.58  | 1.24  | 2.76  | 6.00   |

|                                              |       |      |      |      |      |      |      |       |
|----------------------------------------------|-------|------|------|------|------|------|------|-------|
| Lachnospiraceae[G-2] sp oral taxon 088 LA-07 | 12.13 | 0.01 | 0.04 | 1.00 | 0.29 | 2.76 | 2.58 | 0.16  |
| Eubacterium[11][G-7] yurii EU-10             | 15.88 | 0.00 | 0.01 | 0.59 | 5.44 | 0.03 | 0.00 | 0.05  |
| Lactobacillus Genus probe 2 GP-045           | 53.55 | 0.00 | 0.00 | 0.00 | 0.00 | 0.00 | 0.00 | 10.89 |
| Propionibacterium propionicum PR-55          | 13.23 | 0.00 | 0.03 | 1.00 | 0.96 | 0.71 | 0.98 | 0.11  |
| Olsenella uli OL-04                          | 19.53 | 0.00 | 0.00 | 0.10 | 0.00 | 0.03 | 0.00 | 7.95  |
| Lactobacillus Genus probe 4 GP-047           | 27.25 | 0.00 | 0.00 | 0.00 | 0.00 | 0.00 | 0.01 | 5.84  |
| Lactobacillus Genus probe 5 GP-048           | 17.46 | 0.00 | 0.01 | 0.28 | 0.00 | 0.00 | 0.00 | 5.74  |
| Bifidobacterium Genus probe 1 GP-014         | 14.35 | 0.00 | 0.02 | 1.00 | 0.00 | 0.00 | 0.05 | 5.05  |
| Selenomonas sp oral taxon 134 SE-25          | 15.55 | 0.00 | 0.01 | 0.69 | 0.00 | 0.09 | 0.65 | 0.68  |
| Veillonella denticariosi VE-18               | 11.71 | 0.01 | 0.04 | 1.00 | 0.07 | 0.15 | 0.24 | 1.11  |
| Selenomonas sp oral taxon 134 SE-26          | 18.12 | 0.00 | 0.00 | 0.20 | 0.09 | 0.00 | 0.24 | 0.89  |
| Selenomonas diana SE-02                      | 11.31 | 0.01 | 0.05 | 1.00 | 0.04 | 0.15 | 0.38 | 0.05  |
| Streptococcus cristatus ST-11                | 11.37 | 0.01 | 0.05 | 1.00 | 0.16 | 0.41 | 0.16 | 0.11  |
| Selenomonas sp oral taxon 478 SE-16          | 12.05 | 0.01 | 0.04 | 1.00 | 0.07 | 0.03 | 0.23 | 0.53  |
| Streptococcus Genus probe 3 GP-128           | 23.64 | 0.00 | 0.00 | 0.01 | 0.04 | 0.00 | 0.09 | 0.68  |
| Propionibacterium acidifaciens PR-52         | 17.46 | 0.00 | 0.01 | 0.28 | 0.00 | 0.00 | 0.00 | 0.37  |
| Propionibacterium sp oral taxon 915 PR-59    | 12.56 | 0.01 | 0.03 | 1.00 | 0.13 | 0.00 | 0.00 | 0.00  |
| Lachnospiraceae[G-5] sp oral taxon 455 LA-11 | 11.40 | 0.01 | 0.05 | 1.00 | 0.02 | 0.00 | 0.00 | 0.11  |
| Lactobacillus sp oral taxon 052 LA-26        | 17.46 | 0.00 | 0.01 | 0.28 | 0.00 | 0.00 | 0.00 | 0.16  |

**S3:** Normalized OTUs counts as a mean for all plaque groups.

| OTU                                          | Test-Statistic | P    | FDR_P | Bonferroni_P | CF-PF mean | CAE-PF mean | CA-PF, CAE-PE, CA-PE mean | CA-PD mean |
|----------------------------------------------|----------------|------|-------|--------------|------------|-------------|---------------------------|------------|
| <i>Abiotrophia defectiva</i> AB-01           | 4.02           | 0.26 | 0.46  | 1.00         | 593.62     | 765.97      | 608.30                    | 341.26     |
| <i>Acinetobacter</i> Genus probe GP-002      | 1.14           | 0.77 | 0.82  | 1.00         | 0.00       | 0.00        | 0.01                      | 0.00       |
| <i>Actinobaculum</i> sp oral taxon 183 AC-03 | 3.85           | 0.28 | 0.47  | 1.00         | 997.73     | 868.18      | 2051.72                   | 621.21     |
| <i>Actinomyces</i> Genus probe 1 GP-097      | 5.48           | 0.14 | 0.30  | 1.00         | 2.76       | 0.00        | 1.29                      | 6.42       |
| <i>Actinomyces</i> Genus probe 2 GP-098      | 8.15           | 0.04 | 0.12  | 1.00         | 2.27       | 2.88        | 1.29                      | 0.26       |
| <i>Actinomyces</i> Genus probe 3 GP-003      | 6.77           | 0.08 | 0.19  | 1.00         | 952.09     | 469.12      | 433.40                    | 587.58     |
| <i>Actinomyces</i> Genus probe 4 GP-004      | 2.12           | 0.55 | 0.71  | 1.00         | 59.02      | 59.79       | 103.27                    | 101.84     |
| <i>Actinomyces georgiae</i> AC-06            | 8.17           | 0.04 | 0.12  | 1.00         | 8.64       | 1.62        | 3.19                      | 3.84       |
| <i>Actinomyces gerencseriae</i> AC-07        | 19.36          | 0.00 | 0.00  | 0.11         | 24.13      | 104.35      | 125.73                    | 82.74      |
| <i>Actinomyces graevenitzii</i> AC-35        | 1.93           | 0.59 | 0.75  | 1.00         | 0.11       | 0.06        | 0.15                      | 0.37       |
| <i>Actinomyces israelii</i> AC-09            | 3.10           | 0.38 | 0.55  | 1.00         | 10.49      | 4.32        | 3.67                      | 1.05       |
| <i>Actinomyces johnsonii</i> AC-10           | 18.92          | 0.00 | 0.00  | 0.14         | 35.49      | 100.35      | 24.15                     | 3.05       |
| <i>Actinomyces massiliensis</i> AC-11        | 16.49          | 0.00 | 0.01  | 0.44         | 101.07     | 125.71      | 114.71                    | 34.00      |
| <i>Actinomyces meyeri</i> AC-12              | 17.10          | 0.00 | 0.01  | 0.33         | 12.18      | 9.03        | 7.35                      | 4.53       |
| <i>Actinomyces naeslundii</i> AC-13          | 13.40          | 0.00 | 0.02  | 1.00         | 5.29       | 2.56        | 61.44                     | 76.47      |
| <i>Actinomyces naeslundii</i> AC-36          | 11.92          | 0.01 | 0.04  | 1.00         | 623.38     | 417.91      | 469.14                    | 413.32     |
| <i>Actinomyces odontolyticus</i> AC-14       | 1.06           | 0.79 | 0.83  | 1.00         | 0.13       | 0.09        | 0.23                      | 0.11       |
| <i>Actinomyces odontolyticus</i> AC-37       | 1.85           | 0.60 | 0.76  | 1.00         | 8.91       | 33.32       | 19.28                     | 3.63       |
| <i>Actinomyces odontolyticus</i> AC-38       | 8.38           | 0.04 | 0.11  | 1.00         | 0.00       | 0.03        | 0.24                      | 1.68       |
| <i>Actinomyces radidentis</i> AC-16          | 1.14           | 0.77 | 0.82  | 1.00         | 0.00       | 0.00        | 0.01                      | 0.00       |
| <i>Actinomyces radidentis</i> AC-39          | 1.14           | 0.77 | 0.82  | 1.00         | 0.00       | 0.00        | 0.01                      | 0.00       |
| <i>Actinomyces</i> sp oral taxon 169 AC-17   | 2.07           | 0.56 | 0.72  | 1.00         | 1.09       | 0.68        | 0.58                      | 0.63       |
| <i>Actinomyces</i> sp oral taxon 170 AC-18   | 3.67           | 0.30 | 0.49  | 1.00         | 27.53      | 20.97       | 50.58                     | 24.74      |
| <i>Actinomyces</i> sp oral taxon 171 AC-19   | 3.94           | 0.27 | 0.47  | 1.00         | 60.47      | 98.79       | 58.16                     | 20.00      |
| <i>Actinomyces</i> sp oral taxon 172 AC-20   | 1.63           | 0.65 | 0.79  | 1.00         | 0.76       | 0.47        | 0.51                      | 0.84       |
| <i>Actinomyces</i> sp oral taxon 175 AC-21   | 0.90           | 0.83 | 0.86  | 1.00         | 11.82      | 6.29        | 15.48                     | 15.05      |
| <i>Actinomyces</i> sp oral taxon 178 AC-22   | 9.57           | 0.02 | 0.08  | 1.00         | 89.53      | 140.68      | 72.92                     | 15.84      |
| <i>Actinomyces</i> sp oral taxon 181 AC-24   | 5.41           | 0.14 | 0.31  | 1.00         | 4.44       | 2.35        | 2.43                      | 4.74       |
| <i>Actinomyces</i> sp oral taxon 414 AC-25   | 1.98           | 0.58 | 0.73  | 1.00         | 1.42       | 4.74        | 2.64                      | 1.37       |
| <i>Actinomyces</i> sp oral taxon 446 AC-26   | 0.78           | 0.85 | 0.88  | 1.00         | 0.02       | 0.03        | 0.06                      | 0.00       |

|                                                    |       |      |      |      |        |       |        |        |
|----------------------------------------------------|-------|------|------|------|--------|-------|--------|--------|
| <i>Actinomyces</i> sp oral taxon 448 AC-27         | 9.42  | 0.02 | 0.09 | 1.00 | 60.24  | 14.41 | 81.47  | 194.21 |
| <i>Actinomyces</i> sp oral taxon 525 AC-28         | 4.92  | 0.18 | 0.36 | 1.00 | 0.84   | 7.12  | 1.58   | 0.21   |
| <i>Actinomyces</i> sp oral taxon 525 AC-40         | 3.88  | 0.28 | 0.47 | 1.00 | 0.22   | 0.47  | 0.79   | 2.79   |
| <i>Actinomyces</i> sp oral taxon 848 AC-29         | 1.79  | 0.62 | 0.76 | 1.00 | 18.27  | 10.47 | 29.70  | 3.37   |
| <i>Actinomyces</i> sp oral taxon 877 AC-30         | 7.78  | 0.05 | 0.14 | 1.00 | 0.22   | 4.82  | 5.35   | 0.89   |
| <i>Actinomyces</i> sp oral taxon 896 AC-31         | 1.74  | 0.63 | 0.77 | 1.00 | 4.56   | 0.94  | 2.85   | 0.21   |
| <i>Actinomyces</i> sp oral taxon 897 AC-32         | 1.83  | 0.61 | 0.76 | 1.00 | 16.47  | 2.59  | 5.08   | 0.16   |
| <i>Actinomyces timonensis</i> AC-41                | 0.17  | 0.98 | 0.98 | 1.00 | 8.73   | 0.41  | 0.67   | 0.42   |
| <i>Actinomyces viscosus</i> AC-34                  | 10.20 | 0.02 | 0.07 | 1.00 | 1.36   | 0.85  | 0.58   | 0.68   |
| <i>Aggregatibacter actinomycetemcomitans</i> AG-01 | 2.29  | 0.51 | 0.68 | 1.00 | 0.00   | 0.00  | 0.02   | 0.00   |
| <i>Aggregatibacter</i> Genus probe 1 GP-099        | 5.67  | 0.13 | 0.29 | 1.00 | 163.62 | 74.29 | 118.28 | 102.21 |
| <i>Aggregatibacter</i> Genus probe 2 GP-100        | 1.51  | 0.68 | 0.80 | 1.00 | 47.20  | 39.85 | 47.14  | 13.63  |
| <i>Aggregatibacter paraphrophilus</i> AG-03        | 11.18 | 0.01 | 0.05 | 1.00 | 42.24  | 21.35 | 1.13   | 0.00   |
| <i>Aggregatibacter paraphrophilus</i> AG-09        | 14.15 | 0.00 | 0.02 | 1.00 | 16.93  | 45.18 | 30.41  | 1.37   |
| <i>Aggregatibacter</i> sp oral taxon 458 AG-08     | 1.44  | 0.70 | 0.81 | 1.00 | 22.16  | 18.38 | 37.70  | 18.68  |
| <i>Aggregatibacter</i> sp oral taxon 512 AG-05     | 3.48  | 0.32 | 0.52 | 1.00 | 0.96   | 0.44  | 0.91   | 0.68   |
| <i>Aggregatibacter</i> sp oral taxon 513 AG-06     | 3.65  | 0.30 | 0.49 | 1.00 | 110.93 | 25.74 | 53.79  | 27.84  |
| <i>Agrobacterium tumefaciens</i> AG-07             | 3.09  | 0.38 | 0.55 | 1.00 | 0.02   | 0.00  | 0.00   | 0.00   |
| <i>Alloprevotella</i> Genus probe GP-005           | 6.80  | 0.08 | 0.19 | 1.00 | 0.51   | 3.26  | 1.74   | 1.37   |
| <i>Alloprevotella rava</i> AL-02                   | 2.39  | 0.50 | 0.68 | 1.00 | 0.02   | 0.41  | 0.09   | 0.84   |
| <i>Alloprevotella</i> sp oral taxon 308 AL-03      | 5.30  | 0.15 | 0.32 | 1.00 | 0.04   | 0.12  | 0.02   | 0.00   |
| <i>Alloprevotella</i> sp oral taxon 473 AL-04      | 2.79  | 0.42 | 0.60 | 1.00 | 9.69   | 13.62 | 9.90   | 3.79   |
| <i>Alloprevotella</i> sp oral taxon 912 AL-06      | 1.34  | 0.72 | 0.82 | 1.00 | 5.24   | 4.82  | 4.65   | 2.00   |
| <i>Alloprevotella</i> sp oral taxon 913 AL-07      | 6.21  | 0.10 | 0.24 | 1.00 | 0.04   | 0.00  | 0.00   | 0.00   |
| <i>Alloprevotella</i> sp oral taxon 914 AL-08      | 3.51  | 0.32 | 0.51 | 1.00 | 0.24   | 0.00  | 0.23   | 0.11   |
| <i>Alloprevotella</i> sp oral taxon 914 AL-11      | 3.27  | 0.35 | 0.55 | 1.00 | 0.80   | 0.29  | 1.19   | 1.47   |
| <i>Alloprevotella tanneræ</i> AL-09                | 1.52  | 0.68 | 0.80 | 1.00 | 0.67   | 1.76  | 2.08   | 0.21   |
| <i>Anaeroglobus geminatus</i> AN-03                | 1.11  | 0.77 | 0.82 | 1.00 | 0.02   | 0.00  | 0.05   | 0.00   |
| <i>Arcanobacterium haemolyticum</i> AR-01          | 0.90  | 0.82 | 0.86 | 1.00 | 0.13   | 0.09  | 0.16   | 0.05   |
| <i>Atopobium</i> Genus probe GP-009                | 18.84 | 0.00 | 0.00 | 0.14 | 3.20   | 1.21  | 3.83   | 35.95  |
| <i>Atopobium parvulum</i> AT-02                    | 16.49 | 0.00 | 0.01 | 0.44 | 15.96  | 3.26  | 5.16   | 192.11 |
| <i>Atopobium parvulum</i> AT-08                    | 6.95  | 0.07 | 0.18 | 1.00 | 0.27   | 0.15  | 0.21   | 0.89   |
| <i>Atopobium rimæ</i> AT-03                        | 12.62 | 0.01 | 0.03 | 1.00 | 0.91   | 16.24 | 30.66  | 118.95 |
| <i>Atopobium rimæ</i> AT-09                        | 0.74  | 0.86 | 0.88 | 1.00 | 0.16   | 0.06  | 0.03   | 0.00   |

|                                                 |       |      |      |      |        |        |        |        |
|-------------------------------------------------|-------|------|------|------|--------|--------|--------|--------|
| Atopobium sp oral taxon 199 AT-04               | 3.93  | 0.27 | 0.47 | 1.00 | 0.00   | 0.00   | 0.01   | 0.05   |
| Atopobium sp oral taxon 810 AT-06               | 8.68  | 0.03 | 0.10 | 1.00 | 0.00   | 0.00   | 0.00   | 0.05   |
| Bacteroidales[G-2] sp oral taxon 274 BA-03      | 4.91  | 0.18 | 0.36 | 1.00 | 2.36   | 1.88   | 12.64  | 1.68   |
| Bacteroides Genus probe GP-010                  | 5.74  | 0.12 | 0.28 | 1.00 | 0.04   | 0.00   | 0.00   | 0.05   |
| Bacteroidetes[G-5] Genus probe GP-012           | 1.14  | 0.77 | 0.82 | 1.00 | 0.00   | 0.00   | 0.01   | 0.00   |
| Bacteroidetes[G-5] sp oral taxon 505 BA-15      | 1.14  | 0.77 | 0.82 | 1.00 | 0.00   | 0.00   | 0.01   | 0.00   |
| Bacteroidetes[G-5] sp oral taxon 511 BA-17      | 3.15  | 0.37 | 0.55 | 1.00 | 0.00   | 0.00   | 0.02   | 0.58   |
| Bergeyella sp oral taxon 322 BE-02              | 20.92 | 0.00 | 0.00 | 0.05 | 202.47 | 272.65 | 145.33 | 51.37  |
| Bergeyella sp oral taxon 900 BE-03              | 5.31  | 0.15 | 0.32 | 1.00 | 10.96  | 25.29  | 12.92  | 3.53   |
| Bergeyella sp oral taxon 907 BE-04              | 10.35 | 0.02 | 0.06 | 1.00 | 23.51  | 22.74  | 39.60  | 8.95   |
| Bifidobacteriaceae[G-2] sp oral taxon 407 BI-01 | 8.68  | 0.03 | 0.10 | 1.00 | 0.00   | 0.00   | 0.00   | 0.16   |
| Bifidobacterium animalis subsp lactis BI-03     | 4.41  | 0.22 | 0.41 | 1.00 | 0.00   | 0.03   | 0.00   | 0.00   |
| Bifidobacterium dentium BI-05                   | 2.21  | 0.53 | 0.70 | 1.00 | 0.04   | 0.47   | 0.83   | 136.63 |
| Bifidobacterium Genus probe 1 GP-014            | 14.35 | 0.00 | 0.02 | 1.00 | 0.00   | 0.00   | 0.05   | 5.05   |
| Bifidobacterium longum BI-06                    | 3.09  | 0.38 | 0.55 | 1.00 | 0.00   | 0.00   | 0.12   | 0.05   |
| Campylobacter concisus CA-01                    | 9.37  | 0.02 | 0.09 | 1.00 | 14.36  | 13.15  | 23.78  | 16.68  |
| Campylobacter concisus CA-02                    | 20.50 | 0.00 | 0.00 | 0.07 | 5.44   | 3.12   | 12.64  | 14.79  |
| Campylobacter curvus CA-03                      | 0.85  | 0.84 | 0.87 | 1.00 | 0.47   | 0.06   | 0.20   | 0.16   |
| Campylobacter Genus probe 1 GP-102              | 7.20  | 0.07 | 0.17 | 1.00 | 0.49   | 1.09   | 1.90   | 0.68   |
| Campylobacter Genus probe 2 GP-019              | 16.36 | 0.00 | 0.01 | 0.47 | 23.67  | 16.44  | 39.40  | 34.53  |
| Campylobacter gracilis CA-04                    | 18.39 | 0.00 | 0.00 | 0.18 | 63.16  | 42.88  | 139.71 | 119.47 |
| Campylobacter sp oral taxon 044 CA-06           | 3.09  | 0.38 | 0.55 | 1.00 | 0.02   | 0.00   | 0.00   | 0.00   |
| Capnocytophaga Genus probe 1 GP-103             | 5.56  | 0.14 | 0.29 | 1.00 | 0.60   | 0.94   | 1.23   | 0.79   |
| Capnocytophaga Genus probe 2 GP-020             | 9.67  | 0.02 | 0.08 | 1.00 | 37.16  | 74.91  | 80.94  | 49.53  |
| Capnocytophaga Genus probe 3 GP-021             | 16.11 | 0.00 | 0.01 | 0.53 | 7.47   | 26.03  | 25.49  | 9.37   |
| Capnocytophaga gingivalis CA-09                 | 2.90  | 0.41 | 0.58 | 1.00 | 22.00  | 74.85  | 38.06  | 14.84  |
| Capnocytophaga granulosa CA-10                  | 8.76  | 0.03 | 0.10 | 1.00 | 16.64  | 27.44  | 58.05  | 18.47  |
| Capnocytophaga haemolytica CA-11                | 2.53  | 0.47 | 0.65 | 1.00 | 0.84   | 10.53  | 2.08   | 0.00   |
| Capnocytophaga leadbetteri CA-12                | 4.81  | 0.19 | 0.38 | 1.00 | 42.27  | 43.35  | 54.57  | 26.26  |
| Capnocytophaga ochracea CA-13                   | 3.87  | 0.28 | 0.47 | 1.00 | 0.00   | 0.00   | 0.05   | 0.05   |
| Capnocytophaga sp oral taxon 323 CA-14          | 2.25  | 0.52 | 0.69 | 1.00 | 0.04   | 1.29   | 0.48   | 0.05   |
| Capnocytophaga sp oral taxon 332 CA-17          | 8.55  | 0.04 | 0.11 | 1.00 | 2.40   | 0.71   | 4.13   | 1.32   |
| Capnocytophaga sp oral taxon 335 CA-19          | 5.96  | 0.11 | 0.26 | 1.00 | 0.62   | 2.29   | 3.27   | 6.58   |
| Capnocytophaga sp oral taxon 336 CA-20          | 14.18 | 0.00 | 0.02 | 1.00 | 1.20   | 1.35   | 4.13   | 4.32   |



|                                                 |       |      |      |      |        |        |        |        |
|-------------------------------------------------|-------|------|------|------|--------|--------|--------|--------|
| Capnocytophaga sp oral taxon 338 CA-21          | 5.99  | 0.11 | 0.26 | 1.00 | 1.18   | 3.65   | 2.21   | 2.32   |
| Capnocytophaga sp oral taxon 380 CA-22          | 1.33  | 0.72 | 0.82 | 1.00 | 0.02   | 0.03   | 0.05   | 0.00   |
| Capnocytophaga sp oral taxon 412 CA-23          | 1.23  | 0.75 | 0.82 | 1.00 | 0.04   | 0.00   | 0.02   | 0.00   |
| Capnocytophaga sp oral taxon 863 CA-24          | 3.58  | 0.31 | 0.50 | 1.00 | 0.11   | 0.35   | 0.48   | 0.00   |
| Capnocytophaga sp oral taxon 864 CA-25          | 8.94  | 0.03 | 0.10 | 1.00 | 0.11   | 0.12   | 0.56   | 0.32   |
| Capnocytophaga sp oral taxon 901 CA-27          | 2.29  | 0.51 | 0.68 | 1.00 | 0.00   | 0.00   | 0.03   | 0.00   |
| Capnocytophaga sp oral taxon 902 CA-28          | 0.98  | 0.81 | 0.84 | 1.00 | 1.38   | 1.06   | 1.20   | 1.79   |
| Capnocytophaga sp oral taxon 903 CA-29          | 1.65  | 0.65 | 0.78 | 1.00 | 3.53   | 0.59   | 1.22   | 0.74   |
| Capnocytophaga sputigena CA-30                  | 4.35  | 0.23 | 0.42 | 1.00 | 68.49  | 49.88  | 64.67  | 47.63  |
| Cardiobacterium Genus probe GP-022              | 4.10  | 0.25 | 0.45 | 1.00 | 34.02  | 71.12  | 64.10  | 15.68  |
| Cardiobacterium hominis CA-31                   | 14.08 | 0.00 | 0.02 | 1.00 | 185.36 | 146.32 | 159.26 | 92.95  |
| Cardiobacterium valvarum CA-32                  | 4.06  | 0.25 | 0.46 | 1.00 | 31.47  | 19.82  | 28.50  | 8.95   |
| Catonella Genus probe GP-023                    | 0.88  | 0.83 | 0.86 | 1.00 | 15.49  | 9.32   | 17.38  | 9.00   |
| Caulobacter sp oral taxon 002 CA-35             | 8.68  | 0.03 | 0.10 | 1.00 | 0.00   | 0.00   | 0.00   | 0.05   |
| Centipeda periodontii CE-01                     | 3.68  | 0.30 | 0.49 | 1.00 | 2.16   | 1.79   | 2.87   | 3.11   |
| Clostridiales[F-2][G-1] sp oral taxon 075 CL-03 | 8.48  | 0.04 | 0.11 | 1.00 | 0.02   | 0.09   | 0.24   | 0.05   |
| Clostridiales[F-2][G-1] sp oral taxon 075 CL-08 | 8.57  | 0.04 | 0.11 | 1.00 | 56.38  | 154.32 | 229.59 | 45.58  |
| Clostridiales[F-2][G-2] sp oral taxon 085 CL-04 | 3.06  | 0.38 | 0.55 | 1.00 | 2.73   | 6.68   | 6.16   | 15.58  |
| Clostridiales[F-2][G-3] sp oral taxon 381 CL-06 | 0.48  | 0.92 | 0.93 | 1.00 | 0.16   | 0.09   | 0.56   | 0.05   |
| Corynebacterium diphtheriae CO-07               | 1.28  | 0.73 | 0.82 | 1.00 | 0.82   | 0.59   | 0.94   | 0.84   |
| Corynebacterium diphtheriae CO-08               | 8.84  | 0.03 | 0.10 | 1.00 | 0.87   | 0.41   | 1.19   | 0.47   |
| Corynebacterium durum CO-02                     | 12.15 | 0.01 | 0.04 | 1.00 | 688.11 | 623.79 | 361.99 | 284.32 |
| Corynebacterium Genus probe GP-025              | 11.21 | 0.01 | 0.05 | 1.00 | 98.13  | 146.21 | 77.56  | 53.00  |
| Corynebacterium matruchotii CO-03               | 7.62  | 0.05 | 0.15 | 1.00 | 736.40 | 650.00 | 676.81 | 591.95 |
| Cryptobacterium curtum CR-01                    | 47.95 | 0.00 | 0.00 | 0.00 | 0.02   | 1.82   | 0.65   | 28.00  |
| Dialister Genus probe 2 GP-094                  | 10.58 | 0.01 | 0.06 | 1.00 | 0.09   | 0.68   | 0.76   | 8.79   |
| Dialister invisus DI-01                         | 14.95 | 0.00 | 0.01 | 0.91 | 8.09   | 20.94  | 36.41  | 55.84  |
| Dialister microaerophilus DI-02                 | 2.74  | 0.43 | 0.61 | 1.00 | 0.00   | 0.03   | 0.05   | 0.05   |
| Dialister pneumosintes DI-03                    | 1.15  | 0.76 | 0.82 | 1.00 | 0.02   | 0.06   | 0.57   | 0.95   |
| Dialister sp oral taxon 119 DI-04               | 8.68  | 0.03 | 0.10 | 1.00 | 0.00   | 0.00   | 0.00   | 0.11   |
| Dialister sp oral taxon 502 DI-07               | 0.66  | 0.88 | 0.90 | 1.00 | 0.47   | 0.59   | 0.33   | 2.26   |
| Dialister sp oral taxon 502 DI-09               | 1.14  | 0.77 | 0.82 | 1.00 | 0.00   | 0.00   | 0.01   | 0.00   |
| Eikenella corrodens EI-01                       | 11.58 | 0.01 | 0.04 | 1.00 | 42.24  | 65.76  | 64.06  | 19.37  |
| Eikenella sp oral taxon 011 EI-02               | 4.96  | 0.17 | 0.36 | 1.00 | 0.00   | 0.26   | 0.09   | 0.00   |

|                                                               |       |      |      |      |        |        |        |        |
|---------------------------------------------------------------|-------|------|------|------|--------|--------|--------|--------|
| <i>Enterococcus faecalis</i> EN-02                            | 1.14  | 0.77 | 0.82 | 1.00 | 0.00   | 0.00   | 0.28   | 0.00   |
| <i>Enterococcus</i> Genus probe 3 GP-030                      | 3.09  | 0.38 | 0.55 | 1.00 | 0.02   | 0.00   | 0.00   | 0.00   |
| <i>Erysipelothrichaceae</i> [G-1]_sp_oral_taxon_905_ER-02     | 1.14  | 0.77 | 0.82 | 1.00 | 0.00   | 0.00   | 0.01   | 0.00   |
| <i>Escherichia</i> Genus probe GP-033                         | 3.46  | 0.33 | 0.52 | 1.00 | 0.00   | 0.00   | 0.03   | 0.00   |
| <i>Eubacterium</i> Genus probe 1 GP-034                       | 7.04  | 0.07 | 0.18 | 1.00 | 0.51   | 1.74   | 2.58   | 1.32   |
| <i>Eubacterium</i> [11][G-1]_infirmum EU-02                   | 5.87  | 0.12 | 0.27 | 1.00 | 0.24   | 0.09   | 0.65   | 0.00   |
| <i>Eubacterium</i> [11][G-1]_sulci EU-03                      | 5.16  | 0.16 | 0.34 | 1.00 | 0.11   | 0.09   | 0.05   | 0.79   |
| <i>Eubacterium</i> [11][G-3]_brachy EU-04                     | 1.83  | 0.61 | 0.76 | 1.00 | 9.18   | 26.85  | 28.40  | 10.16  |
| <i>Eubacterium</i> [11][G-6]_nodatum EU-07                    | 3.09  | 0.38 | 0.55 | 1.00 | 0.04   | 0.00   | 0.00   | 0.00   |
| <i>Eubacterium</i> [11][G-7]_yurii EU-08                      | 6.88  | 0.08 | 0.19 | 1.00 | 15.78  | 13.47  | 5.91   | 4.32   |
| <i>Eubacterium</i> [11][G-7]_yurii EU-10                      | 15.88 | 0.00 | 0.01 | 0.59 | 5.44   | 0.03   | 0.00   | 0.05   |
| <i>Filifactor alocis</i> FI-01                                | 1.14  | 0.77 | 0.82 | 1.00 | 0.00   | 0.00   | 0.01   | 0.00   |
| <i>Fretibacterium fastidiosum</i> FR-01                       | 2.29  | 0.51 | 0.68 | 1.00 | 0.00   | 0.00   | 0.03   | 0.00   |
| <i>Fretibacterium</i> Genus probe 3 GP-037                    | 4.41  | 0.22 | 0.41 | 1.00 | 0.00   | 0.03   | 0.00   | 0.00   |
| <i>Fretibacterium</i> sp oral taxon 360 FR-04                 | 3.09  | 0.38 | 0.55 | 1.00 | 0.02   | 0.00   | 0.00   | 0.00   |
| <i>Fusobacterium</i> Genus probe 1 GP-109                     | 1.11  | 0.77 | 0.82 | 1.00 | 0.24   | 0.18   | 0.36   | 0.37   |
| <i>Fusobacterium</i> Genus probe 2 GP-095                     | 13.37 | 0.00 | 0.02 | 1.00 | 23.00  | 38.76  | 52.91  | 39.16  |
| <i>Fusobacterium</i> Genus probe 3 GP-096                     | 12.70 | 0.01 | 0.03 | 1.00 | 116.02 | 98.44  | 106.63 | 38.58  |
| <i>Fusobacterium</i> Genus probe 4 GP-038                     | 5.95  | 0.11 | 0.26 | 1.00 | 139.27 | 151.82 | 176.63 | 201.32 |
| <i>Fusobacterium nucleatum</i> subsp <i>animalis</i> FU-05    | 9.27  | 0.03 | 0.09 | 1.00 | 2.36   | 2.29   | 1.74   | 1.11   |
| <i>Fusobacterium nucleatum</i> subsp <i>animalis</i> FU-06    | 8.59  | 0.04 | 0.11 | 1.00 | 2.76   | 2.03   | 2.08   | 1.05   |
| <i>Fusobacterium nucleatum</i> subsp <i>nucleatum</i> FU-07   | 3.58  | 0.31 | 0.50 | 1.00 | 3.49   | 2.68   | 3.98   | 2.68   |
| <i>Fusobacterium nucleatum</i> subsp <i>polymorphum</i> FU-08 | 8.27  | 0.04 | 0.12 | 1.00 | 2.16   | 1.88   | 1.50   | 0.53   |
| <i>Fusobacterium nucleatum</i> subsp <i>vincentii</i> FU-09   | 2.64  | 0.45 | 0.63 | 1.00 | 1.29   | 2.32   | 1.91   | 1.26   |
| <i>Fusobacterium periodonticum</i> FU-10                      | 4.68  | 0.20 | 0.39 | 1.00 | 154.42 | 112.56 | 92.73  | 57.47  |
| <i>Fusobacterium</i> sp oral taxon 205 FU-11                  | 6.07  | 0.11 | 0.25 | 1.00 | 1.91   | 1.53   | 1.47   | 0.79   |
| <i>Gemella bergeri</i> GE-01                                  | 4.32  | 0.23 | 0.42 | 1.00 | 0.00   | 0.06   | 2.28   | 2.95   |
| <i>Gemella</i> Genus probe GP-039                             | 17.13 | 0.00 | 0.01 | 0.33 | 229.87 | 411.82 | 559.21 | 139.26 |
| <i>Gemella haemolysans</i> GE-02                              | 11.58 | 0.01 | 0.04 | 1.00 | 102.22 | 260.68 | 254.05 | 112.00 |
| <i>Gemella morbillorum</i> GE-03                              | 11.76 | 0.01 | 0.04 | 1.00 | 108.22 | 235.12 | 216.69 | 62.68  |
| <i>Gemella morbillorum</i> GE-05                              | 13.55 | 0.00 | 0.02 | 1.00 | 88.96  | 179.88 | 312.83 | 78.89  |
| <i>Gemella sanguinis</i> GE-04                                | 5.59  | 0.13 | 0.29 | 1.00 | 5.38   | 8.65   | 7.15   | 20.11  |

|                                              |       |      |      |      |        |        |        |        |
|----------------------------------------------|-------|------|------|------|--------|--------|--------|--------|
| GN02[G-1] sp oral taxon 871 GN-01            | 6.97  | 0.07 | 0.18 | 1.00 | 5.02   | 9.59   | 8.93   | 0.95   |
| GN02[G-1] sp oral taxon 872 GN-02            | 9.03  | 0.03 | 0.10 | 1.00 | 25.09  | 22.21  | 12.10  | 5.58   |
| GN02[G-2] sp oral taxon 873 GN-03            | 6.06  | 0.11 | 0.25 | 1.00 | 0.82   | 5.65   | 0.47   | 0.00   |
| Granulicatella elegans GR-02                 | 11.60 | 0.01 | 0.04 | 1.00 | 59.84  | 83.12  | 101.81 | 42.00  |
| Granulicatella Genus probe GP-110            | 1.85  | 0.60 | 0.76 | 1.00 | 411.60 | 615.85 | 486.06 | 398.74 |
| Haemophilus Genus probe 2 GP-112             | 1.19  | 0.75 | 0.82 | 1.00 | 1.38   | 1.26   | 1.47   | 1.53   |
| Haemophilus Genus probe 3 GP-040             | 8.13  | 0.04 | 0.12 | 1.00 | 3.76   | 7.06   | 8.86   | 9.53   |
| Haemophilus parahaemolyticus HA-04           | 3.26  | 0.35 | 0.55 | 1.00 | 4.71   | 1.94   | 2.98   | 0.95   |
| Haemophilus parainfluenzae HA-05             | 15.47 | 0.00 | 0.01 | 0.72 | 946.44 | 480.82 | 440.99 | 421.26 |
| Haemophilus sp oral taxon 035 HA-06          | 0.23  | 0.97 | 0.98 | 1.00 | 6.67   | 1.24   | 8.26   | 1.42   |
| Helicobacter Genus probe GP-041              | 1.79  | 0.62 | 0.76 | 1.00 | 0.00   | 0.03   | 0.01   | 0.00   |
| Johnsonella Genus probe GP-042               | 3.67  | 0.30 | 0.49 | 1.00 | 0.24   | 0.03   | 0.33   | 0.21   |
| Johnsonella ignava JO-01                     | 9.66  | 0.02 | 0.08 | 1.00 | 7.02   | 1.44   | 9.15   | 4.79   |
| Johnsonella sp oral taxon 166 JO-02          | 3.09  | 0.38 | 0.55 | 1.00 | 0.02   | 0.00   | 0.00   | 0.00   |
| Kingella Genus probe 1 GP-113                | 8.80  | 0.03 | 0.10 | 1.00 | 89.64  | 51.44  | 77.74  | 243.74 |
| Kingella Genus probe 2 GP-114                | 2.97  | 0.40 | 0.57 | 1.00 | 4.82   | 6.71   | 5.40   | 2.05   |
| Kingella oralis KI-03                        | 2.09  | 0.55 | 0.71 | 1.00 | 177.93 | 155.35 | 176.44 | 140.42 |
| Kingella sp oral taxon 459 KI-04             | 5.58  | 0.13 | 0.29 | 1.00 | 0.00   | 0.03   | 0.00   | 0.05   |
| Lachnoanaerobaculum Genus probe GP-044       | 14.22 | 0.00 | 0.02 | 1.00 | 6.11   | 2.15   | 8.38   | 4.79   |
| Lachnoanaerobaculum orale LA-01              | 18.83 | 0.00 | 0.00 | 0.15 | 2.13   | 10.82  | 18.40  | 17.32  |
| Lachnoanaerobaculum saburreum LA-02          | 22.27 | 0.00 | 0.00 | 0.03 | 39.33  | 44.53  | 126.63 | 107.42 |
| Lachnoanaerobaculum sp oral taxon 083 LA-03  | 1.39  | 0.71 | 0.82 | 1.00 | 0.56   | 0.24   | 0.30   | 0.16   |
| Lachnoanaerobaculum umeaense LA-06           | 7.71  | 0.05 | 0.14 | 1.00 | 118.36 | 69.00  | 75.80  | 46.00  |
| Lachnospiraceae[G-2] sp oral taxon 088 LA-07 | 12.13 | 0.01 | 0.04 | 1.00 | 0.29   | 2.76   | 2.58   | 0.16   |
| Lachnospiraceae[G-2] sp oral taxon 088 LA-30 | 3.03  | 0.39 | 0.56 | 1.00 | 0.02   | 0.15   | 0.07   | 0.00   |
| Lachnospiraceae[G-2] sp oral taxon 096 LA-08 | 3.14  | 0.37 | 0.55 | 1.00 | 4.02   | 51.09  | 8.60   | 0.74   |
| Lachnospiraceae[G-3] sp oral taxon 100 LA-09 | 6.62  | 0.09 | 0.21 | 1.00 | 13.36  | 43.62  | 17.67  | 4.58   |
| Lachnospiraceae[G-3] sp oral taxon 100 LA-31 | 11.08 | 0.01 | 0.05 | 1.00 | 4.07   | 3.97   | 9.27   | 1.47   |
| Lachnospiraceae[G-3] sp oral taxon 100 LA-32 | 4.73  | 0.19 | 0.38 | 1.00 | 0.09   | 0.21   | 0.55   | 0.05   |
| Lachnospiraceae[G-5] sp oral taxon 455 LA-11 | 11.40 | 0.01 | 0.05 | 1.00 | 0.02   | 0.00   | 0.00   | 0.11   |
| Lachnospiraceae[G-7] sp oral taxon 086 LA-13 | 3.73  | 0.29 | 0.48 | 1.00 | 0.00   | 0.32   | 0.19   | 0.11   |
| Lachnospiraceae[G-7] sp oral taxon 163 LA-14 | 2.20  | 0.53 | 0.70 | 1.00 | 0.00   | 0.06   | 0.09   | 0.00   |
| Lactobacillus brevis LA-16                   | 8.68  | 0.03 | 0.10 | 1.00 | 0.00   | 0.00   | 0.00   | 0.05   |
| Lactobacillus coleohominis LA-17             | 2.05  | 0.56 | 0.72 | 1.00 | 0.04   | 0.03   | 0.03   | 0.11   |

|                                       |       |      |      |      |         |         |         |         |
|---------------------------------------|-------|------|------|------|---------|---------|---------|---------|
| Lactobacillus fermentum LA-18         | 55.95 | 0.00 | 0.00 | 0.00 | 0.00    | 0.00    | 0.05    | 29.95   |
| Lactobacillus Genus probe 1 GP-115    | 28.88 | 0.00 | 0.00 | 0.00 | 0.00    | 0.06    | 0.21    | 162.16  |
| Lactobacillus Genus probe 2 GP-045    | 53.55 | 0.00 | 0.00 | 0.00 | 0.00    | 0.00    | 0.00    | 10.89   |
| Lactobacillus Genus probe 3 GP-046    | 17.22 | 0.00 | 0.01 | 0.31 | 0.87    | 0.97    | 0.87    | 139.79  |
| Lactobacillus Genus probe 4 GP-047    | 27.25 | 0.00 | 0.00 | 0.00 | 0.00    | 0.00    | 0.01    | 5.84    |
| Lactobacillus Genus probe 5 GP-048    | 17.46 | 0.00 | 0.01 | 0.28 | 0.00    | 0.00    | 0.00    | 5.74    |
| Lactobacillus jensenii LA-21          | 8.68  | 0.03 | 0.10 | 1.00 | 0.00    | 0.00    | 0.00    | 0.05    |
| Lactobacillus kisonensis LA-22        | 8.68  | 0.03 | 0.10 | 1.00 | 0.00    | 0.00    | 0.00    | 0.05    |
| Lactobacillus salivarius LA-25        | 43.61 | 0.00 | 0.00 | 0.00 | 0.00    | 0.06    | 0.59    | 487.42  |
| Lactobacillus sp oral taxon 052 LA-26 | 17.46 | 0.00 | 0.01 | 0.28 | 0.00    | 0.00    | 0.00    | 0.16    |
| Lactobacillus vaginalis LA-27         | 18.80 | 0.00 | 0.00 | 0.15 | 0.00    | 0.00    | 0.03    | 23.68   |
| Lactococcus lactis LA-28              | 4.14  | 0.25 | 0.44 | 1.00 | 0.13    | 0.00    | 0.05    | 0.42    |
| Lautropia mirabilis LA-29             | 18.14 | 0.00 | 0.00 | 0.20 | 1873.60 | 1493.00 | 1098.88 | 358.47  |
| Leptothrix sp oral taxon 024 LE-01    | 1.67  | 0.64 | 0.78 | 1.00 | 0.00    | 0.03    | 0.03    | 0.00    |
| Leptotrichia Genus probe 3 GP-049     | 10.73 | 0.01 | 0.06 | 1.00 | 154.22  | 85.06   | 253.81  | 77.16   |
| Leptotrichia Genus probe 4 GP-050     | 4.36  | 0.23 | 0.42 | 1.00 | 540.29  | 462.06  | 617.45  | 367.26  |
| Leptotrichia goodfellowii LE-04       | 11.22 | 0.01 | 0.05 | 1.00 | 46.04   | 29.18   | 29.81   | 12.37   |
| Leptotrichia hongkongensis LE-06      | 1.13  | 0.77 | 0.82 | 1.00 | 1280.36 | 1895.32 | 1273.71 | 1424.47 |
| Leptotrichia shahii LE-07             | 6.78  | 0.08 | 0.19 | 1.00 | 1997.47 | 1068.56 | 1845.02 | 976.58  |
| Leptotrichia sp oral taxon 212 LE-08  | 4.78  | 0.19 | 0.38 | 1.00 | 249.78  | 187.12  | 245.53  | 147.74  |
| Leptotrichia sp oral taxon 215 LE-09  | 10.81 | 0.01 | 0.05 | 1.00 | 0.00    | 0.00    | 0.01    | 0.16    |
| Leptotrichia sp oral taxon 215 LE-26  | 0.83  | 0.84 | 0.87 | 1.00 | 24.16   | 16.32   | 30.40   | 38.11   |
| Leptotrichia sp oral taxon 217 LE-10  | 1.14  | 0.77 | 0.82 | 1.00 | 0.00    | 0.00    | 0.01    | 0.00    |
| Leptotrichia sp oral taxon 218 LE-11  | 5.28  | 0.15 | 0.32 | 1.00 | 1.29    | 0.50    | 17.12   | 0.32    |
| Leptotrichia sp oral taxon 219 LE-12  | 8.53  | 0.04 | 0.11 | 1.00 | 13.42   | 104.32  | 40.03   | 4.74    |
| Leptotrichia sp oral taxon 221 LE-13  | 2.16  | 0.54 | 0.70 | 1.00 | 10.49   | 11.56   | 16.03   | 95.26   |
| Leptotrichia sp oral taxon 223 LE-14  | 1.14  | 0.77 | 0.82 | 1.00 | 0.00    | 0.00    | 0.01    | 0.00    |
| Leptotrichia sp oral taxon 223 LE-25  | 6.46  | 0.09 | 0.22 | 1.00 | 51.07   | 33.00   | 47.60   | 16.37   |
| Leptotrichia sp oral taxon 392 LE-15  | 12.01 | 0.01 | 0.04 | 1.00 | 101.53  | 71.97   | 170.50  | 47.37   |
| Leptotrichia sp oral taxon 417 LE-16  | 4.19  | 0.24 | 0.44 | 1.00 | 304.44  | 128.76  | 404.65  | 120.42  |
| Leptotrichia sp oral taxon 462 LE-17  | 4.41  | 0.22 | 0.41 | 1.00 | 0.00    | 0.03    | 0.00    | 0.00    |
| Leptotrichia sp oral taxon 463 LE-18  | 0.53  | 0.91 | 0.93 | 1.00 | 0.04    | 0.03    | 0.87    | 0.05    |
| Leptotrichia sp oral taxon 498 LE-19  | 11.52 | 0.01 | 0.04 | 1.00 | 60.58   | 122.12  | 322.77  | 675.74  |
| Leptotrichia sp oral taxon 847 LE-20  | 2.29  | 0.51 | 0.68 | 1.00 | 0.00    | 0.00    | 0.14    | 0.00    |

|                                      |       |      |      |      |         |         |         |         |
|--------------------------------------|-------|------|------|------|---------|---------|---------|---------|
| Leptotrichia sp oral taxon 879 LE-21 | 7.07  | 0.07 | 0.18 | 1.00 | 2.80    | 34.97   | 11.47   | 1.47    |
| Leptotrichia wadei LE-22             | 11.32 | 0.01 | 0.05 | 1.00 | 319.31  | 309.47  | 677.91  | 501.21  |
| Megasphaera micronuciformis ME-01    | 24.89 | 0.00 | 0.00 | 0.01 | 0.16    | 0.38    | 5.16    | 23.74   |
| Megasphaera sp oral taxon 123 ME-02  | 3.09  | 0.38 | 0.55 | 1.00 | 0.02    | 0.00    | 0.00    | 0.00    |
| Megasphaera sp oral taxon 123 ME-03  | 8.68  | 0.03 | 0.10 | 1.00 | 0.00    | 0.00    | 0.00    | 0.58    |
| Mitsuokella sp oral taxon 131 MI-03  | 7.95  | 0.05 | 0.13 | 1.00 | 0.00    | 0.00    | 0.14    | 0.74    |
| Mitsuokella sp oral taxon 521 MI-05  | 2.29  | 0.51 | 0.68 | 1.00 | 0.00    | 0.00    | 0.02    | 0.00    |
| Mitsuokella sp oral taxon 521 MI-06  | 3.46  | 0.33 | 0.52 | 1.00 | 0.00    | 0.00    | 0.07    | 0.00    |
| Mogibacterium Genus probe GP-056     | 4.78  | 0.19 | 0.38 | 1.00 | 1.04    | 3.09    | 2.79    | 17.74   |
| Moraxella Genus probe 2 GP-057       | 3.09  | 0.38 | 0.55 | 1.00 | 0.04    | 0.00    | 0.00    | 0.00    |
| Mycobacterium Genus probe GP-058     | 1.14  | 0.77 | 0.82 | 1.00 | 0.00    | 0.00    | 0.01    | 0.00    |
| Mycoplasma salivarium MY-10          | 1.33  | 0.72 | 0.82 | 1.00 | 0.02    | 0.03    | 0.05    | 0.00    |
| Neisseria bacilliformis NE-01        | 23.97 | 0.00 | 0.00 | 0.01 | 7.84    | 2.24    | 3.40    | 1.53    |
| Neisseria elongata NE-02             | 10.16 | 0.02 | 0.07 | 1.00 | 215.38  | 95.68   | 117.37  | 66.89   |
| Neisseria flavescens NE-03           | 3.75  | 0.29 | 0.48 | 1.00 | 634.82  | 222.79  | 262.13  | 252.21  |
| Neisseria flavescens NE-16           | 8.02  | 0.05 | 0.13 | 1.00 | 1.62    | 0.79    | 1.13    | 0.00    |
| Neisseria Genus probe 1 GP-119       | 4.66  | 0.20 | 0.39 | 1.00 | 66.49   | 64.94   | 39.86   | 2.89    |
| Neisseria Genus probe 2 GP-060       | 18.68 | 0.00 | 0.00 | 0.16 | 4417.78 | 2126.32 | 2189.22 | 1805.58 |
| Neisseria lactamica NE-05            | 9.35  | 0.02 | 0.09 | 1.00 | 0.02    | 0.09    | 0.00    | 0.00    |
| Neisseria meningitidis NE-06         | 11.25 | 0.01 | 0.05 | 1.00 | 3.91    | 1.74    | 2.05    | 1.42    |
| Neisseria pharyngis NE-08            | 16.43 | 0.00 | 0.01 | 0.46 | 293.40  | 56.18   | 110.60  | 4.95    |
| Neisseria pharyngis NE-15            | 10.56 | 0.01 | 0.06 | 1.00 | 0.93    | 0.35    | 22.07   | 0.05    |
| Neisseria sicca NE-09                | 6.69  | 0.08 | 0.20 | 1.00 | 2.29    | 1.41    | 41.20   | 111.63  |
| Neisseria sp oral taxon 018 NE-10    | 3.44  | 0.33 | 0.52 | 1.00 | 0.00    | 18.85   | 0.42    | 0.00    |
| Neisseria sp oral taxon 499 NE-12    | 0.38  | 0.95 | 0.95 | 1.00 | 9.02    | 15.53   | 2.84    | 4.84    |
| Olsenella Genus probe GP-061         | 8.80  | 0.03 | 0.10 | 1.00 | 0.02    | 0.06    | 0.22    | 4.68    |
| Olsenella profusa OL-01              | 12.39 | 0.01 | 0.04 | 1.00 | 0.00    | 0.09    | 0.65    | 186.53  |
| Olsenella sp oral taxon 807 OL-02    | 8.41  | 0.04 | 0.11 | 1.00 | 0.98    | 1.79    | 8.05    | 5.37    |
| Olsenella sp oral taxon 809 OL-03    | 7.42  | 0.06 | 0.16 | 1.00 | 0.09    | 0.06    | 0.05    | 0.32    |
| Olsenella uli OL-04                  | 19.53 | 0.00 | 0.00 | 0.10 | 0.00    | 0.03    | 0.00    | 7.95    |
| Oribacterium Genus probe GP-120      | 12.62 | 0.01 | 0.03 | 1.00 | 7.87    | 9.47    | 19.06   | 23.32   |
| Oribacterium sinus OR-01             | 10.00 | 0.02 | 0.07 | 1.00 | 2.33    | 4.03    | 8.88    | 12.47   |
| Oribacterium sp oral taxon 102 OR-03 | 3.29  | 0.35 | 0.55 | 1.00 | 0.00    | 0.00    | 0.03    | 0.05    |
| Oribacterium sp oral taxon 108 OR-04 | 2.13  | 0.55 | 0.71 | 1.00 | 0.18    | 0.21    | 0.08    | 0.00    |

|                                                        |       |      |      |      |        |        |        |        |
|--------------------------------------------------------|-------|------|------|------|--------|--------|--------|--------|
| Oribacterium sp oral taxon 108 OR-05                   | 6.78  | 0.08 | 0.19 | 1.00 | 0.20   | 0.53   | 1.38   | 2.00   |
| Oribacterium sp oral taxon 108 OR-06                   | 0.56  | 0.91 | 0.92 | 1.00 | 0.02   | 0.03   | 0.02   | 0.05   |
| Ottowia sp oral taxon 894 OT-01                        | 7.19  | 0.07 | 0.17 | 1.00 | 0.84   | 4.62   | 2.07   | 0.00   |
| Ottowia sp oral taxon 894 OT-02                        | 29.03 | 0.00 | 0.00 | 0.00 | 28.27  | 65.91  | 6.43   | 0.00   |
| Parascardovia denticolens PA-02                        | 42.37 | 0.00 | 0.00 | 0.00 | 0.02   | 0.53   | 0.88   | 655.74 |
| Parvimonas Genus probe GP-063                          | 9.67  | 0.02 | 0.08 | 1.00 | 16.64  | 27.24  | 49.62  | 11.74  |
| Parvimonas micra PA-03                                 | 2.48  | 0.48 | 0.66 | 1.00 | 5.44   | 57.94  | 8.77   | 1.95   |
| Parvimonas sp oral taxon 110 PA-04                     | 14.51 | 0.00 | 0.02 | 1.00 | 68.20  | 29.94  | 7.67   | 0.05   |
| Peptococcus sp oral taxon 167 PE-01                    | 5.78  | 0.12 | 0.28 | 1.00 | 0.00   | 0.09   | 1.24   | 0.63   |
| Peptococcus sp oral taxon 167 PE-22                    | 3.24  | 0.36 | 0.55 | 1.00 | 5.16   | 1.65   | 6.09   | 3.63   |
| Peptoniphilus asaccharolyticus PE-03                   | 1.23  | 0.75 | 0.82 | 1.00 | 0.02   | 0.00   | 0.03   | 0.00   |
| Peptoniphilus Genus probe GP-064                       | 1.14  | 0.77 | 0.82 | 1.00 | 0.00   | 0.00   | 0.01   | 0.00   |
| Peptoniphilus sp oral taxon 836 PE-08                  | 4.41  | 0.22 | 0.41 | 1.00 | 0.00   | 0.03   | 0.00   | 0.00   |
| Peptostreptococcaceae[11][G-4] sp oral taxon 369 PE-14 | 2.29  | 0.51 | 0.68 | 1.00 | 0.00   | 0.00   | 0.05   | 0.00   |
| Peptostreptococcaceae[11][G-7] sp oral taxon 081 PE-16 | 2.19  | 0.53 | 0.70 | 1.00 | 0.00   | 0.06   | 0.03   | 0.00   |
| Peptostreptococcaceae[11][G-7] sp oral taxon 106 PE-17 | 1.36  | 0.72 | 0.82 | 1.00 | 0.07   | 0.06   | 0.05   | 0.00   |
| Peptostreptococcaceae[13][G-1] sp oral taxon 113 PE-18 | 4.41  | 0.22 | 0.41 | 1.00 | 0.00   | 0.03   | 0.00   | 0.00   |
| Peptostreptococcus Genus probe GP-065                  | 4.73  | 0.19 | 0.38 | 1.00 | 0.80   | 0.50   | 0.98   | 0.53   |
| Peptostreptococcus stomatis PE-21                      | 12.11 | 0.01 | 0.04 | 1.00 | 15.07  | 11.09  | 22.64  | 13.26  |
| Porphyromonas catoniae PO-02                           | 1.60  | 0.66 | 0.79 | 1.00 | 0.04   | 3.32   | 0.44   | 0.00   |
| Porphyromonas catoniae PO-14                           | 2.29  | 0.52 | 0.68 | 1.00 | 0.49   | 0.26   | 4.41   | 0.32   |
| Porphyromonas catoniae PO-15                           | 5.66  | 0.13 | 0.29 | 1.00 | 3.36   | 1.12   | 10.34  | 13.63  |
| Porphyromonas catoniae PO-16                           | 2.06  | 0.56 | 0.72 | 1.00 | 21.27  | 14.44  | 27.29  | 8.53   |
| Porphyromonas catoniae PO-17                           | 1.18  | 0.76 | 0.82 | 1.00 | 40.33  | 24.00  | 36.37  | 14.47  |
| Porphyromonas catoniae PO-18                           | 10.12 | 0.02 | 0.07 | 1.00 | 0.11   | 0.15   | 0.47   | 0.11   |
| Porphyromonas endodontalis PO-03                       | 1.96  | 0.58 | 0.74 | 1.00 | 1.11   | 0.24   | 0.10   | 0.00   |
| Porphyromonas Genus probe 1 GP-066                     | 0.81  | 0.85 | 0.87 | 1.00 | 0.16   | 0.12   | 0.12   | 0.11   |
| Porphyromonas Genus probe 2 GP-067                     | 10.12 | 0.02 | 0.07 | 1.00 | 177.27 | 171.47 | 300.72 | 74.32  |
| Porphyromonas gingivalis PO-05                         | 1.14  | 0.77 | 0.82 | 1.00 | 0.00   | 0.00   | 0.01   | 0.00   |
| Porphyromonas sp oral taxon 275 PO-06                  | 1.59  | 0.66 | 0.79 | 1.00 | 2.04   | 0.12   | 0.05   | 0.00   |
| Porphyromonas sp oral taxon 275 PO-19                  | 7.12  | 0.07 | 0.18 | 1.00 | 14.11  | 7.65   | 45.99  | 12.95  |

|                                              |       |      |      |      |        |        |        |        |
|----------------------------------------------|-------|------|------|------|--------|--------|--------|--------|
| <i>Porphyromonas</i> sp oral taxon 275 PO-20 | 4.37  | 0.22 | 0.42 | 1.00 | 0.13   | 0.12   | 0.30   | 0.00   |
| <i>Porphyromonas</i> sp oral taxon 277 PO-21 | 3.63  | 0.30 | 0.49 | 1.00 | 0.58   | 0.50   | 0.66   | 0.05   |
| <i>Porphyromonas</i> sp oral taxon 277 PO-22 | 5.05  | 0.17 | 0.35 | 1.00 | 9.91   | 4.79   | 13.99  | 0.00   |
| <i>Porphyromonas</i> sp oral taxon 278 PO-23 | 5.25  | 0.15 | 0.32 | 1.00 | 1.64   | 3.18   | 2.55   | 1.79   |
| <i>Porphyromonas</i> sp oral taxon 279 PO-09 | 7.84  | 0.05 | 0.14 | 1.00 | 157.20 | 192.53 | 213.16 | 40.26  |
| <i>Porphyromonas</i> sp oral taxon 279 PO-24 | 1.53  | 0.68 | 0.80 | 1.00 | 30.80  | 19.32  | 52.48  | 31.26  |
| <i>Porphyromonas</i> sp oral taxon 279 PO-25 | 1.47  | 0.69 | 0.81 | 1.00 | 0.87   | 0.38   | 1.40   | 0.42   |
| <i>Porphyromonas</i> sp oral taxon 284 PO-10 | 3.81  | 0.28 | 0.47 | 1.00 | 0.27   | 0.32   | 0.50   | 0.16   |
| <i>Porphyromonas</i> sp oral taxon 285 PO-11 | 0.88  | 0.83 | 0.86 | 1.00 | 0.07   | 0.03   | 0.03   | 0.00   |
| <i>Porphyromonas</i> sp oral taxon 395 PO-12 | 2.29  | 0.51 | 0.68 | 1.00 | 0.00   | 0.00   | 0.02   | 0.00   |
| <i>Prevotella baroniae</i> PR-01             | 4.41  | 0.22 | 0.41 | 1.00 | 0.00   | 0.03   | 0.00   | 0.00   |
| <i>Prevotella buccae</i> PR-03               | 0.52  | 0.91 | 0.93 | 1.00 | 0.02   | 0.03   | 0.02   | 0.00   |
| <i>Prevotella denticola</i> PR-06            | 18.56 | 0.00 | 0.00 | 0.17 | 1.42   | 22.44  | 22.23  | 154.37 |
| <i>Prevotella enoeca</i> PR-07               | 1.14  | 0.77 | 0.82 | 1.00 | 0.00   | 0.00   | 0.02   | 0.00   |
| <i>Prevotella</i> Genus probe 1 GP-121       | 4.96  | 0.17 | 0.36 | 1.00 | 3.73   | 2.06   | 2.81   | 7.26   |
| <i>Prevotella</i> Genus probe 2 GP-069       | 18.58 | 0.00 | 0.00 | 0.16 | 20.89  | 21.97  | 57.69  | 83.89  |
| <i>Prevotella histicola</i> PR-09            | 7.54  | 0.06 | 0.15 | 1.00 | 20.42  | 4.38   | 31.00  | 17.16  |
| <i>Prevotella intermedia</i> PR-10           | 7.31  | 0.06 | 0.16 | 1.00 | 0.00   | 0.00   | 1.79   | 3.95   |
| <i>Prevotella intermedia</i> PR-65           | 1.12  | 0.77 | 0.82 | 1.00 | 0.60   | 0.03   | 0.15   | 0.00   |
| <i>Prevotella loescheii</i> PR-66            | 0.55  | 0.91 | 0.92 | 1.00 | 0.58   | 7.41   | 6.13   | 0.63   |
| <i>Prevotella loescheii</i> PR-67            | 1.89  | 0.60 | 0.75 | 1.00 | 0.16   | 0.21   | 0.17   | 0.00   |
| <i>Prevotella maculosa</i> PR-12             | 24.24 | 0.00 | 0.00 | 0.01 | 4.24   | 5.59   | 15.66  | 10.58  |
| <i>Prevotella marshii</i> PR-68              | 3.86  | 0.28 | 0.47 | 1.00 | 0.00   | 0.00   | 0.07   | 0.05   |
| <i>Prevotella melaninogenica</i> PR-14       | 10.28 | 0.02 | 0.07 | 1.00 | 61.89  | 154.00 | 188.55 | 209.00 |
| <i>Prevotella micans</i> PR-15               | 6.50  | 0.09 | 0.22 | 1.00 | 0.38   | 3.44   | 6.38   | 4.53   |
| <i>Prevotella micans</i> PR-69               | 8.87  | 0.03 | 0.10 | 1.00 | 0.00   | 0.21   | 0.00   | 0.00   |
| <i>Prevotella multisaccharivorax</i> PR-17   | 1.14  | 0.77 | 0.82 | 1.00 | 0.00   | 0.00   | 0.02   | 0.00   |
| <i>Prevotella nigrescens</i> PR-18           | 10.95 | 0.01 | 0.05 | 1.00 | 22.07  | 52.32  | 107.52 | 50.42  |
| <i>Prevotella oralis</i> PR-19               | 4.37  | 0.22 | 0.42 | 1.00 | 0.00   | 0.32   | 0.17   | 0.26   |
| <i>Prevotella oris</i> PR-20                 | 11.09 | 0.01 | 0.05 | 1.00 | 23.67  | 32.79  | 76.47  | 99.68  |
| <i>Prevotella oulorum</i> PR-21              | 22.55 | 0.00 | 0.00 | 0.02 | 9.87   | 38.15  | 83.08  | 43.53  |
| <i>Prevotella pallens</i> PR-22              | 0.46  | 0.93 | 0.94 | 1.00 | 0.18   | 0.26   | 1.28   | 1.53   |
| <i>Prevotella pallens</i> PR-70              | 3.29  | 0.35 | 0.55 | 1.00 | 0.02   | 0.06   | 0.20   | 0.11   |
| <i>Prevotella pleuritidis</i> PR-23          | 6.37  | 0.09 | 0.23 | 1.00 | 0.56   | 0.97   | 1.28   | 1.63   |

|                                                  |       |      |      |      |        |        |        |         |
|--------------------------------------------------|-------|------|------|------|--------|--------|--------|---------|
| <i>Prevotella saccharolytica</i> PR-71           | 2.45  | 0.48 | 0.67 | 1.00 | 5.78   | 8.18   | 10.13  | 4.21    |
| <i>Prevotella saccharolytica</i> PR-72           | 2.81  | 0.42 | 0.60 | 1.00 | 1.64   | 7.44   | 3.53   | 1.47    |
| <i>Prevotella salivae</i> PR-25                  | 23.58 | 0.00 | 0.00 | 0.02 | 2.27   | 3.09   | 25.99  | 20.68   |
| <i>Prevotella scopos</i> PR-26                   | 1.14  | 0.77 | 0.82 | 1.00 | 0.00   | 0.00   | 0.01   | 0.00    |
| <i>Prevotella shahii</i> PR-27                   | 4.30  | 0.23 | 0.42 | 1.00 | 0.04   | 0.03   | 0.00   | 0.00    |
| <i>Prevotella</i> sp oral taxon 292 PR-28        | 3.19  | 0.36 | 0.55 | 1.00 | 0.00   | 0.21   | 0.45   | 0.05    |
| <i>Prevotella</i> sp oral taxon 296 PR-31        | 3.11  | 0.37 | 0.55 | 1.00 | 0.00   | 0.00   | 0.02   | 0.05    |
| <i>Prevotella</i> sp oral taxon 300 PR-33        | 1.49  | 0.68 | 0.80 | 1.00 | 0.24   | 2.68   | 3.45   | 0.58    |
| <i>Prevotella</i> sp oral taxon 300 PR-34        | 2.26  | 0.52 | 0.69 | 1.00 | 0.00   | 0.32   | 0.06   | 0.16    |
| <i>Prevotella</i> sp oral taxon 301 PR-35        | 3.86  | 0.28 | 0.47 | 1.00 | 0.00   | 0.00   | 0.29   | 0.05    |
| <i>Prevotella</i> sp oral taxon 305 PR-37        | 3.97  | 0.26 | 0.47 | 1.00 | 0.00   | 0.00   | 0.01   | 0.21    |
| <i>Prevotella</i> sp oral taxon 306 PR-38        | 3.93  | 0.27 | 0.47 | 1.00 | 0.00   | 0.00   | 0.01   | 0.05    |
| <i>Prevotella</i> sp oral taxon 309 PR-39        | 3.44  | 0.33 | 0.52 | 1.00 | 0.04   | 0.00   | 0.09   | 0.16    |
| <i>Prevotella</i> sp oral taxon 310 PR-40        | 1.14  | 0.77 | 0.82 | 1.00 | 0.00   | 0.00   | 0.01   | 0.00    |
| <i>Prevotella</i> sp oral taxon 315 PR-41        | 4.98  | 0.17 | 0.36 | 1.00 | 0.00   | 0.06   | 0.01   | 0.00    |
| <i>Prevotella</i> sp oral taxon 317 PR-42        | 7.99  | 0.05 | 0.13 | 1.00 | 31.60  | 5.74   | 27.77  | 21.05   |
| <i>Prevotella</i> sp oral taxon 317 PR-73        | 11.24 | 0.01 | 0.05 | 1.00 | 23.31  | 6.97   | 17.85  | 15.21   |
| <i>Prevotella</i> sp oral taxon 317 PR-74        | 3.78  | 0.29 | 0.48 | 1.00 | 0.27   | 0.03   | 1.74   | 6.26    |
| <i>Prevotella</i> sp oral taxon 396 PR-44        | 7.87  | 0.05 | 0.14 | 1.00 | 0.02   | 0.00   | 0.08   | 6.37    |
| <i>Prevotella</i> sp oral taxon 443 PR-45        | 10.17 | 0.02 | 0.07 | 1.00 | 0.00   | 0.06   | 0.15   | 0.21    |
| <i>Prevotella</i> sp oral taxon 472 PR-46        | 1.58  | 0.66 | 0.79 | 1.00 | 23.82  | 40.71  | 53.69  | 28.21   |
| <i>Prevotella</i> sp oral taxon 475 PR-47        | 2.74  | 0.43 | 0.61 | 1.00 | 0.36   | 0.15   | 0.43   | 0.05    |
| <i>Prevotella veroralis</i> PR-51                | 2.66  | 0.45 | 0.62 | 1.00 | 2.27   | 0.47   | 1.51   | 3.63    |
| <i>Propionibacterium acidifaciens</i> PR-52      | 17.46 | 0.00 | 0.01 | 0.28 | 0.00   | 0.00   | 0.00   | 0.37    |
| <i>Propionibacterium</i> Genus probe GP-070      | 3.97  | 0.26 | 0.47 | 1.00 | 0.00   | 0.00   | 0.02   | 0.32    |
| <i>Propionibacterium propionicum</i> PR-55       | 13.23 | 0.00 | 0.03 | 1.00 | 0.96   | 0.71   | 0.98   | 0.11    |
| <i>Propionibacterium</i> sp oral taxon 194 PR-58 | 0.78  | 0.85 | 0.88 | 1.00 | 0.40   | 0.38   | 1.20   | 0.16    |
| <i>Propionibacterium</i> sp oral taxon 915 PR-59 | 12.56 | 0.01 | 0.03 | 1.00 | 0.13   | 0.00   | 0.00   | 0.00    |
| <i>Pseudomonas</i> Genus probe GP-072            | 3.20  | 0.36 | 0.55 | 1.00 | 0.04   | 0.00   | 0.01   | 0.00    |
| <i>Pseudoramibacter alactolyticus</i> PS-06      | 1.23  | 0.75 | 0.82 | 1.00 | 0.02   | 0.00   | 0.19   | 0.00    |
| <i>Rothia aerea</i> RO-01                        | 18.96 | 0.00 | 0.00 | 0.14 | 566.09 | 537.76 | 299.41 | 160.00  |
| <i>Rothia dentocariosa</i> RO-02                 | 3.30  | 0.35 | 0.55 | 1.00 | 488.78 | 674.03 | 596.26 | 1030.11 |
| <i>Rothia</i> Genus probe GP-073                 | 2.69  | 0.44 | 0.62 | 1.00 | 359.29 | 311.91 | 299.60 | 433.00  |
| <i>Rothia mucilaginosa</i> RO-03                 | 7.80  | 0.05 | 0.14 | 1.00 | 28.22  | 171.18 | 53.10  | 236.00  |



|                                            |       |      |      |      |       |       |        |        |
|--------------------------------------------|-------|------|------|------|-------|-------|--------|--------|
| Scardovia Genus probe GP-075               | 46.24 | 0.00 | 0.00 | 0.00 | 0.02  | 0.29  | 0.09   | 40.00  |
| Scardovia inopinata SC-01                  | 16.07 | 0.00 | 0.01 | 0.54 | 0.00  | 0.09  | 0.27   | 23.05  |
| Scardovia wiggisiae SC-02                  | 54.09 | 0.00 | 0.00 | 0.00 | 0.20  | 5.85  | 2.20   | 834.84 |
| Selenomonas & Centipeda Genus probe GP-076 | 9.87  | 0.02 | 0.07 | 1.00 | 37.20 | 25.53 | 67.38  | 44.37  |
| Selenomonas artemidis SE-01                | 5.37  | 0.15 | 0.31 | 1.00 | 7.62  | 11.53 | 18.62  | 7.16   |
| Selenomonas artemidis SE-21                | 6.24  | 0.10 | 0.24 | 1.00 | 9.20  | 36.03 | 12.00  | 2.58   |
| Selenomonas dianae SE-02                   | 11.31 | 0.01 | 0.05 | 1.00 | 0.04  | 0.15  | 0.38   | 0.05   |
| Selenomonas dianae SE-22                   | 9.16  | 0.03 | 0.10 | 1.00 | 3.53  | 3.24  | 5.20   | 3.74   |
| Selenomonas flueggei SE-03                 | 5.88  | 0.12 | 0.27 | 1.00 | 0.87  | 2.76  | 5.23   | 1.74   |
| Selenomonas Genus probe 1 GP-122           | 15.55 | 0.00 | 0.01 | 0.69 | 5.96  | 7.56  | 15.09  | 10.74  |
| Selenomonas Genus probe 2 GP-123           | 12.21 | 0.01 | 0.04 | 1.00 | 1.11  | 0.59  | 4.12   | 2.11   |
| Selenomonas noxia SE-04                    | 1.18  | 0.76 | 0.82 | 1.00 | 85.24 | 59.32 | 90.01  | 122.53 |
| Selenomonas noxia SE-05                    | 7.29  | 0.06 | 0.17 | 1.00 | 43.49 | 45.74 | 148.94 | 69.42  |
| Selenomonas sp oral taxon 133 SE-06        | 6.43  | 0.09 | 0.22 | 1.00 | 0.07  | 0.44  | 1.17   | 0.00   |
| Selenomonas sp oral taxon 133 SE-24        | 3.09  | 0.38 | 0.55 | 1.00 | 0.02  | 0.00  | 0.00   | 0.00   |
| Selenomonas sp oral taxon 134 SE-25        | 15.55 | 0.00 | 0.01 | 0.69 | 0.00  | 0.09  | 0.65   | 0.68   |
| Selenomonas sp oral taxon 134 SE-26        | 18.12 | 0.00 | 0.00 | 0.20 | 0.09  | 0.00  | 0.24   | 0.89   |
| Selenomonas sp oral taxon 136 SE-08        | 1.52  | 0.68 | 0.80 | 1.00 | 0.09  | 0.32  | 0.33   | 0.21   |
| Selenomonas sp oral taxon 137 SE-09        | 7.02  | 0.07 | 0.18 | 1.00 | 4.80  | 1.76  | 12.23  | 2.79   |
| Selenomonas sp oral taxon 137 SE-28        | 9.02  | 0.03 | 0.10 | 1.00 | 22.60 | 18.59 | 12.47  | 0.63   |
| Selenomonas sp oral taxon 137 SE-29        | 1.14  | 0.77 | 0.82 | 1.00 | 0.00  | 0.00  | 0.01   | 0.00   |
| Selenomonas sp oral taxon 138 SE-10        | 1.08  | 0.78 | 0.82 | 1.00 | 0.47  | 0.53  | 0.49   | 0.42   |
| Selenomonas sp oral taxon 146 SE-12        | 8.51  | 0.04 | 0.11 | 1.00 | 5.11  | 3.44  | 7.72   | 7.53   |
| Selenomonas sp oral taxon 149 SE-13        | 23.22 | 0.00 | 0.00 | 0.02 | 0.31  | 2.91  | 5.85   | 5.74   |
| Selenomonas sp oral taxon 478 SE-16        | 12.05 | 0.01 | 0.04 | 1.00 | 0.07  | 0.03  | 0.23   | 0.53   |
| Selenomonas sputigena SE-18                | 15.70 | 0.00 | 0.01 | 0.64 | 8.44  | 40.03 | 32.57  | 18.21  |
| Selenomonas sputigena SE-19                | 4.21  | 0.24 | 0.44 | 1.00 | 0.93  | 3.03  | 2.13   | 1.79   |
| Selenomonas sputigena SE-31                | 2.25  | 0.52 | 0.69 | 1.00 | 0.00  | 0.26  | 0.17   | 0.05   |
| Selenomonas sputigena SE-32                | 10.58 | 0.01 | 0.06 | 1.00 | 0.02  | 0.91  | 9.67   | 1.37   |
| Selenomonas sputigena SE-33                | 1.77  | 0.62 | 0.76 | 1.00 | 0.00  | 0.03  | 0.02   | 0.00   |
| Shuttleworthia satelles SH-01              | 9.39  | 0.02 | 0.09 | 1.00 | 0.11  | 2.18  | 4.38   | 53.26  |
| Simonsiella muelleri SI-01                 | 3.87  | 0.28 | 0.47 | 1.00 | 0.00  | 0.00  | 0.09   | 0.11   |
| Slackia exigua SL-01                       | 4.70  | 0.20 | 0.38 | 1.00 | 0.51  | 0.18  | 0.21   | 0.00   |
| Slackia Genus probe GP-077                 | 1.13  | 0.77 | 0.82 | 1.00 | 0.07  | 0.00  | 0.01   | 0.00   |

|                                        |       |      |      |      |         |         |         |         |
|----------------------------------------|-------|------|------|------|---------|---------|---------|---------|
| Sneathia amnionii SN-01                | 1.14  | 0.77 | 0.82 | 1.00 | 0.00    | 0.00    | 0.01    | 0.00    |
| Solobacterium moorei SO-01             | 1.55  | 0.67 | 0.80 | 1.00 | 30.49   | 13.32   | 16.08   | 6.05    |
| Sphingomonas Genus probe GP-078        | 3.93  | 0.27 | 0.47 | 1.00 | 0.00    | 0.00    | 0.01    | 0.05    |
| SR1 Genus probe GP-079                 | 11.27 | 0.01 | 0.05 | 1.00 | 4.80    | 5.79    | 7.10    | 1.05    |
| SR1[G-1] sp oral taxon 345 SR-01       | 4.34  | 0.23 | 0.42 | 1.00 | 1.96    | 1.68    | 4.08    | 0.47    |
| SR1[G-1] sp oral taxon 874 SR-02       | 16.10 | 0.00 | 0.01 | 0.53 | 22.98   | 24.38   | 26.33   | 2.16    |
| SR1[G-1] sp oral taxon 875 SR-03       | 2.56  | 0.46 | 0.64 | 1.00 | 5.76    | 3.09    | 7.57    | 0.21    |
| Staphylococcus Genus probe 3 GP-080    | 3.21  | 0.36 | 0.55 | 1.00 | 0.09    | 0.00    | 0.22    | 0.05    |
| Stenotrophomonas maltophilia ST-03     | 2.29  | 0.51 | 0.68 | 1.00 | 0.00    | 0.00    | 0.05    | 0.00    |
| Stenotrophomonas maltophilia ST-29     | 1.14  | 0.77 | 0.82 | 1.00 | 0.00    | 0.00    | 0.01    | 0.00    |
| Stomatobaculum longum ST-04            | 13.11 | 0.00 | 0.03 | 1.00 | 1.98    | 2.68    | 11.05   | 15.05   |
| Stomatobaculum sp oral taxon 097 ST-05 | 3.82  | 0.28 | 0.47 | 1.00 | 2.84    | 6.18    | 3.92    | 2.05    |
| Stomatobaculum sp oral taxon 910 ST-07 | 3.87  | 0.28 | 0.47 | 1.00 | 0.00    | 0.00    | 0.05    | 0.05    |
| Streptococcus agalactiae ST-08         | 3.09  | 0.38 | 0.55 | 1.00 | 0.02    | 0.00    | 0.00    | 0.00    |
| Streptococcus anginosus ST-09          | 24.55 | 0.00 | 0.00 | 0.01 | 1.42    | 19.74   | 26.38   | 11.79   |
| Streptococcus constellatus ST-10       | 8.47  | 0.04 | 0.11 | 1.00 | 17.89   | 0.03    | 9.41    | 0.84    |
| Streptococcus cristatus ST-11          | 11.37 | 0.01 | 0.05 | 1.00 | 0.16    | 0.41    | 0.16    | 0.11    |
| Streptococcus Genus probe 1 GP-126     | 4.97  | 0.17 | 0.36 | 1.00 | 837.98  | 1037.09 | 860.49  | 787.00  |
| Streptococcus Genus probe 2 GP-127     | 3.82  | 0.28 | 0.47 | 1.00 | 0.16    | 0.21    | 0.22    | 0.00    |
| Streptococcus Genus probe 3 GP-128     | 23.64 | 0.00 | 0.00 | 0.01 | 0.04    | 0.00    | 0.09    | 0.68    |
| Streptococcus Genus probe 4 GP-081     | 19.62 | 0.00 | 0.00 | 0.10 | 5037.82 | 7440.94 | 4935.02 | 3684.00 |
| Streptococcus intermedius ST-14        | 18.19 | 0.00 | 0.00 | 0.20 | 50.60   | 115.62  | 149.22  | 53.74   |
| Streptococcus mutans ST-15             | 77.54 | 0.00 | 0.00 | 0.00 | 33.80   | 15.44   | 121.62  | 5165.11 |
| Streptococcus parasanguinis II ST-16   | 11.94 | 0.01 | 0.04 | 1.00 | 6.33    | 9.76    | 6.78    | 6.05    |
| Streptococcus pyogenes ST-18           | 8.68  | 0.03 | 0.10 | 1.00 | 0.00    | 0.00    | 0.00    | 0.05    |
| Streptococcus sanguinis ST-20          | 13.46 | 0.00 | 0.02 | 1.00 | 2230.76 | 1859.26 | 1682.98 | 913.21  |
| Streptococcus sobrinus ST-21           | 4.65  | 0.20 | 0.39 | 1.00 | 0.00    | 0.00    | 1.99    | 27.21   |
| Streptococcus sp oral taxon 064 ST-22  | 11.89 | 0.01 | 0.04 | 1.00 | 9.22    | 13.88   | 9.97    | 8.47    |
| Streptococcus sp oral taxon 066 ST-23  | 14.39 | 0.00 | 0.02 | 1.00 | 6.80    | 10.68   | 6.49    | 5.79    |
| Streptococcus sp oral taxon 068 ST-24  | 0.60  | 0.90 | 0.91 | 1.00 | 0.33    | 0.35    | 0.35    | 0.21    |
| Streptococcus sp oral taxon 069 ST-25  | 1.14  | 0.77 | 0.82 | 1.00 | 0.00    | 0.00    | 0.01    | 0.00    |
| Streptococcus sp oral taxon 431 ST-26  | 11.58 | 0.01 | 0.04 | 1.00 | 6.04    | 8.97    | 7.14    | 4.74    |
| Streptococcus sp oral taxon 486 ST-27  | 7.67  | 0.05 | 0.14 | 1.00 | 4.36    | 5.03    | 3.69    | 3.05    |
| Streptococcus sp oral taxon 487 ST-28  | 6.11  | 0.11 | 0.25 | 1.00 | 0.16    | 0.06    | 0.06    | 0.00    |

|                                    |       |      |      |      |        |        |        |       |
|------------------------------------|-------|------|------|------|--------|--------|--------|-------|
| Tannerella forsythia TA-01         | 1.23  | 0.75 | 0.82 | 1.00 | 0.04   | 0.00   | 0.03   | 0.00  |
| Tannerella Genus probe GP-082      | 13.92 | 0.00 | 0.02 | 1.00 | 12.80  | 2.44   | 4.40   | 0.74  |
| Tannerella_sp_oral_taxon_286_TA-02 | 14.92 | 0.00 | 0.01 | 0.93 | 45.36  | 45.97  | 72.22  | 12.95 |
| Tannerella_sp_oral_taxon_808_TA-03 | 4.72  | 0.19 | 0.38 | 1.00 | 6.89   | 0.09   | 0.06   | 0.00  |
| Tannerella_sp_oral_taxon_916_TA-04 | 0.23  | 0.97 | 0.98 | 1.00 | 0.04   | 0.03   | 0.81   | 0.05  |
| Tannerella_sp_oral_taxon_916_TA-05 | 1.88  | 0.60 | 0.75 | 1.00 | 0.02   | 0.00   | 0.09   | 0.00  |
| Tannerella_sp_oral_taxon_916_TA-06 | 2.29  | 0.51 | 0.68 | 1.00 | 0.00   | 0.00   | 0.02   | 0.00  |
| Tannerella_sp_oral_taxon_916_TA-07 | 1.67  | 0.64 | 0.78 | 1.00 | 0.02   | 0.00   | 0.17   | 0.16  |
| TM7 Genus probe GP-083             | 17.68 | 0.00 | 0.01 | 0.25 | 65.67  | 186.29 | 148.81 | 65.79 |
| TM7[G-1] sp oral taxon 346 TM-01   | 1.77  | 0.62 | 0.76 | 1.00 | 86.00  | 99.65  | 115.06 | 66.21 |
| TM7[G-1] sp oral taxon 347 TM-02   | 5.59  | 0.13 | 0.29 | 1.00 | 58.56  | 155.62 | 118.87 | 24.21 |
| TM7[G-1] sp oral taxon 348 TM-03   | 17.67 | 0.00 | 0.01 | 0.25 | 0.20   | 22.76  | 99.16  | 14.47 |
| TM7[G-1] sp oral taxon 348 TM-13   | 12.26 | 0.01 | 0.04 | 1.00 | 148.16 | 284.97 | 132.85 | 27.42 |
| TM7[G-1] sp oral taxon 349 TM-04   | 1.59  | 0.66 | 0.79 | 1.00 | 19.76  | 14.79  | 22.33  | 1.74  |
| TM7[G-1] sp oral taxon 352 TM-05   | 1.58  | 0.66 | 0.79 | 1.00 | 1.02   | 1.74   | 1.22   | 0.32  |
| TM7[G-1] sp oral taxon 353 TM-06   | 7.55  | 0.06 | 0.15 | 1.00 | 20.71  | 98.24  | 50.05  | 18.53 |
| TM7[G-1] sp oral taxon 488 TM-07   | 1.23  | 0.75 | 0.82 | 1.00 | 0.02   | 0.00   | 0.02   | 0.00  |
| TM7[G-3] sp oral taxon 351 TM-09   | 23.57 | 0.00 | 0.00 | 0.02 | 0.29   | 3.06   | 5.01   | 0.63  |
| TM7[G-4] sp oral taxon 355 TM-10   | 2.44  | 0.49 | 0.67 | 1.00 | 0.00   | 0.09   | 0.08   | 0.26  |
| TM7[G-5] sp oral taxon 356 TM-11   | 0.91  | 0.82 | 0.86 | 1.00 | 0.02   | 0.06   | 0.01   | 0.00  |
| TM7[G-5] sp oral taxon 437 TM-12   | 13.83 | 0.00 | 0.02 | 1.00 | 0.00   | 0.03   | 9.88   | 5.95  |
| Treponema amylovorum TR-01         | 2.82  | 0.42 | 0.60 | 1.00 | 0.00   | 0.03   | 0.01   | 0.16  |
| Treponema denticola TR-02          | 8.68  | 0.03 | 0.10 | 1.00 | 0.00   | 0.00   | 0.00   | 0.11  |
| Treponema Genus probe 1 GP-129     | 3.27  | 0.35 | 0.55 | 1.00 | 0.07   | 0.00   | 0.13   | 0.16  |
| Treponema Genus probe 2 GP-084     | 2.08  | 0.56 | 0.72 | 1.00 | 0.33   | 0.29   | 0.42   | 0.21  |
| Treponema Genus probe 5 GP-087     | 1.67  | 0.64 | 0.78 | 1.00 | 0.00   | 0.03   | 0.02   | 0.00  |
| Treponema Genus probe 6 GP-088     | 9.82  | 0.02 | 0.08 | 1.00 | 0.09   | 1.29   | 1.19   | 4.11  |
| Treponema lecithinolyticum TR-04   | 1.91  | 0.59 | 0.75 | 1.00 | 0.00   | 0.03   | 0.05   | 0.05  |
| Treponema maltophilum TR-05        | 4.76  | 0.19 | 0.38 | 1.00 | 0.13   | 0.00   | 0.22   | 0.53  |
| Treponema putidum TR-09            | 3.63  | 0.30 | 0.49 | 1.00 | 0.16   | 0.03   | 0.27   | 1.47  |
| Treponema socranskii TR-10         | 3.93  | 0.27 | 0.47 | 1.00 | 0.00   | 0.00   | 0.01   | 0.05  |
| Treponema socranskii TR-11         | 5.80  | 0.12 | 0.28 | 1.00 | 2.38   | 1.24   | 4.10   | 1.42  |
| Treponema socranskii TR-50         | 5.55  | 0.14 | 0.29 | 1.00 | 0.00   | 0.68   | 0.29   | 2.05  |
| Treponema socranskii TR-51         | 3.09  | 0.38 | 0.55 | 1.00 | 0.02   | 0.00   | 0.00   | 0.00  |

|                                              |       |      |      |      |        |        |         |         |
|----------------------------------------------|-------|------|------|------|--------|--------|---------|---------|
| Treponema sp oral taxon 226 TR-12            | 4.41  | 0.22 | 0.41 | 1.00 | 0.00   | 0.15   | 0.00    | 0.00    |
| Treponema sp oral taxon 242 TR-23            | 1.14  | 0.77 | 0.82 | 1.00 | 0.00   | 0.00   | 0.01    | 0.00    |
| Treponema sp oral taxon 247 TR-25            | 1.14  | 0.77 | 0.82 | 1.00 | 0.00   | 0.00   | 0.05    | 0.00    |
| Treponema sp oral taxon 250 TR-27            | 3.09  | 0.38 | 0.55 | 1.00 | 0.02   | 0.00   | 0.00    | 0.00    |
| Treponema sp oral taxon 257 TR-33            | 3.29  | 0.35 | 0.55 | 1.00 | 0.00   | 0.00   | 0.03    | 0.05    |
| Treponema sp oral taxon 268 TR-40            | 4.53  | 0.21 | 0.41 | 1.00 | 0.44   | 0.00   | 0.29    | 1.42    |
| Treponema sp oral taxon 270 TR-43            | 3.09  | 0.38 | 0.55 | 1.00 | 0.02   | 0.00   | 0.00    | 0.00    |
| Treponema sp oral taxon 508 TR-54            | 1.14  | 0.77 | 0.82 | 1.00 | 0.00   | 0.00   | 0.01    | 0.00    |
| Veillonella atypica VE-20                    | 11.60 | 0.01 | 0.04 | 1.00 | 2.82   | 3.62   | 25.35   | 17.63   |
| Veillonella atypica VE-21                    | 18.55 | 0.00 | 0.00 | 0.17 | 4.56   | 2.26   | 26.55   | 23.89   |
| Veillonella denticariosi VE-02               | 4.38  | 0.22 | 0.42 | 1.00 | 15.71  | 10.21  | 14.21   | 82.00   |
| Veillonella denticariosi VE-18               | 11.71 | 0.01 | 0.04 | 1.00 | 0.07   | 0.15   | 0.24    | 1.11    |
| Veillonella dispar VE-03                     | 19.51 | 0.00 | 0.00 | 0.11 | 648.09 | 942.53 | 1165.90 | 1830.32 |
| Veillonella Genus probe 1 GP-130             | 19.78 | 0.00 | 0.00 | 0.09 | 0.58   | 1.24   | 2.76    | 6.00    |
| Veillonella Genus probe 2 GP-089             | 24.64 | 0.00 | 0.00 | 0.01 | 292.07 | 899.15 | 699.64  | 1080.11 |
| Veillonella parvula VE-05                    | 2.36  | 0.50 | 0.68 | 1.00 | 2.76   | 15.88  | 17.76   | 22.32   |
| Veillonella parvula VE-06                    | 34.02 | 0.00 | 0.00 | 0.00 | 27.93  | 86.91  | 92.15   | 390.68  |
| Veillonella rogosae VE-07                    | 1.74  | 0.63 | 0.77 | 1.00 | 2.44   | 1.06   | 2.43    | 3.05    |
| Veillonella sp oral taxon 780 VE-08          | 8.18  | 0.04 | 0.12 | 1.00 | 5.04   | 7.56   | 8.73    | 2.74    |
| Veillonella sp oral taxon 917 VE-09          | 4.41  | 0.22 | 0.41 | 1.00 | 0.00   | 0.03   | 0.00    | 0.00    |
| Veillonellaceae Genus probe 1 GP-131         | 1.79  | 0.62 | 0.76 | 1.00 | 0.00   | 0.03   | 0.01    | 0.00    |
| Veillonellaceae Genus probe 3 GP-090         | 3.91  | 0.27 | 0.47 | 1.00 | 0.00   | 0.09   | 0.23    | 0.00    |
| Veillonellaceae[G-1] sp oral taxon 129 VE-10 | 2.82  | 0.42 | 0.60 | 1.00 | 0.00   | 0.06   | 0.02    | 1.37    |
| Veillonellaceae[G-1] sp oral taxon 155 VE-15 | 2.88  | 0.41 | 0.58 | 1.00 | 0.00   | 0.41   | 1.44    | 0.05    |
| Veillonellaceae[G-1] sp oral taxon 483 VE-16 | 1.77  | 0.62 | 0.76 | 1.00 | 0.00   | 0.06   | 0.08    | 0.00    |

**S4: HOMINGS taxa, species and genus probes.**

| <b>GENUS-LEVEL TARGETS (v2.0)</b> | <b>Species recognized</b>                                                                                                                                                                                                                                                                                                                               |
|-----------------------------------|---------------------------------------------------------------------------------------------------------------------------------------------------------------------------------------------------------------------------------------------------------------------------------------------------------------------------------------------------------|
| Achromobacter Genus probe         | animicus, denitrificans, pulmonis, ruhlandii, xylosoxidans                                                                                                                                                                                                                                                                                              |
| Acinetobacter Genus probe         | baumannii, calcoaceticus, haemolyticus, johnsonii, junii, lwoffii, parvus, radioresistens, tjernbergiae, sp. oral taxon 408                                                                                                                                                                                                                             |
| Actinomyces Genus probe 1         | dentalis, sp. oral taxon 449                                                                                                                                                                                                                                                                                                                            |
| Actinomyces Genus probe 2         | oris, sp. oral taxon 175                                                                                                                                                                                                                                                                                                                                |
| Actinomyces Genus probe 3         | bovis, bowdenii, catuli, denticolens, graevenitzii, howellii, johnsonii, naeslundii, oris, radidentis, slackii, timonensis, urogenitalis, viscosus, sp. oral taxon 169, 170, 171, 175, 177                                                                                                                                                              |
| Actinomyces Genus probe 4         | canis, cardiffensis, funkei, georgiae, hyovaginalis, meyeri, neuui, odontolyticus, suimastitidis, turicensis, vaccimaxillae, sp. oral taxon 172, 178, 180, 877                                                                                                                                                                                          |
| Aggregatibacter Genus probe 1     | aphrophilus, sp. oral taxon 458                                                                                                                                                                                                                                                                                                                         |
| Aggregatibacter Genus probe 2     | segnis, sp. oral taxon 512                                                                                                                                                                                                                                                                                                                              |
| Alloprevotella Genus probe        | rava, tanneriae, sp. oral taxon 308, 473, 474, 914                                                                                                                                                                                                                                                                                                      |
| Anaerococcus Genus probe 1        | prevotii, tetradius                                                                                                                                                                                                                                                                                                                                     |
| Anaerococcus Genus probe 2        | hydrogenalis, lactolyticus, octavius, prevotii, tetradius, vaginalis                                                                                                                                                                                                                                                                                    |
| Aquamicrobium Genus probe         | defluvii, lusatiense                                                                                                                                                                                                                                                                                                                                    |
| Arcanobacterium Genus probe       | haemolyticum, phocae, pluranimalium                                                                                                                                                                                                                                                                                                                     |
| Atopobium Genus probe             | fossor, minutum, parvulum, rimae, sp. oral taxon 199                                                                                                                                                                                                                                                                                                    |
| Bacteroides Genus probe           | cellulosilyticus, coprophilus, denticanoris, heparinolyticus, plebeius, pyogenes, salanitronis, suis, tectus, zoogloformans                                                                                                                                                                                                                             |
| Bacteroidetes[G-3] Genus probe    | sp. oral taxon 280, 281, 365, 436, 503                                                                                                                                                                                                                                                                                                                  |
| Bacteroidetes[G-5] Genus probe    | sp. oral taxon 505, 507, 511                                                                                                                                                                                                                                                                                                                            |
| Bartonella Genus probe            | australis, bacilliformis, bovis, capreoli, chomelii, clarridgeiae, henselae, koehlerae, quintana, schoenbuchensis, weissii, sp. oral taxon 001                                                                                                                                                                                                          |
| Bifidobacterium Genus probe 1     | adolescentis, angulatum, animalis subsp. animalis, animalis subsp. lactis, bifidum, boum, breve, catenulatum, choerinum, dentium, gallicum, longum subsp. infantis, longum subsp. longum, longum subsp. suis, merycicum, pseudocatenulatum, pseudolongum subsp. globosum, pseudolongum subsp. pseudolongum, ruminantium, thermacidophilum, thermophilum |
| Bifidobacterium Genus probe 2     | asteroides, coryneforme, gallinarum, indicum, minimum, pullorum, saeculare, scardovii, simiae, subtile                                                                                                                                                                                                                                                  |
| Bordetella Genus probe            | bronchiseptica, holmesii, parapertussis, pertussis                                                                                                                                                                                                                                                                                                      |

|                                  |                                                                                                                                                                                                                                                                                                           |
|----------------------------------|-----------------------------------------------------------------------------------------------------------------------------------------------------------------------------------------------------------------------------------------------------------------------------------------------------------|
| Brevundimonas Genus probe        | diminuta, ikaite, intermedia, mediterranea, poindexterae, vancouverii, Nitrobacteria hamadaniensis, Nitrobacteria iranicum                                                                                                                                                                                |
| Burkholderia Genus probe         | ambifaria, anthina, arboris, cenocepacia, cepacia, lata, mana, multivorans, pyrrocinia, stabilis, tropica, ubonensis, vietnamiensis                                                                                                                                                                       |
| Campylobacter Genus probe 1      | rectus, showae                                                                                                                                                                                                                                                                                            |
| Campylobacter Genus probe 2      | coli, concisus, cuniculorum, curvus, fetus, gracilis, helveticus, hominis, hyointestinali, jejuni, lanienae, lari, rectus, showae, sputorum, subantarcticus, upsaliensis, ureolyticus, sp. oral taxon 044                                                                                                 |
| Capnocytophaga Genus probe 1     | infantium, sp. oral taxon 326                                                                                                                                                                                                                                                                             |
| Capnocytophaga Genus probe 2     | infantium, leadbetteri, ochracea, sputigena, sp. oral taxon 323, 326, 332, 334, 335, 336, 412, 864, 878, 901, 902, 903                                                                                                                                                                                    |
| Capnocytophaga Genus probe 3     | gingivalis, granulosa, haemolytica, sp. oral taxon 338, 863                                                                                                                                                                                                                                               |
| Cardiobacterium Genus probe      | hominis, valvarum                                                                                                                                                                                                                                                                                         |
| Catonella Genus probe            | morbi, sp. oral taxon 164, 451                                                                                                                                                                                                                                                                            |
| Chlamydomphila Genus probe       | abortus, pecorum, pneumoniae, psittaci                                                                                                                                                                                                                                                                    |
| Corynebacterium Genus probe      | amycolatum, aquilae, atypicum, aurimucosum, caspium, confusum, diphtheriae, durum, freneyi, genitalium, massiliensis, mastitidis, matruhotti, minutissimum, pseudogenitalium, pseudotuberculosis, simulans, singulare, spheniscorum, striatum, sundsvallense, thomssenii, urealyticum, variabile, xerosis |
| Desulfobulbus Genus probe        | elongatus, mediterraneus, propionicus, rhabdiformis, sp. oral taxon 041                                                                                                                                                                                                                                   |
| Dialister Genus probe 1          | microaerophilus, pneumosintes, sp. oral taxon 502                                                                                                                                                                                                                                                         |
| Dialister Genus probe 2          | invisus, propionicifaciens, sp. oral taxon 119, sp. oral taxon 502                                                                                                                                                                                                                                        |
| Dietzia Genus probe              | cinnamea, kunjamensis, maris, papillomatosis, sp. oral taxon 368                                                                                                                                                                                                                                          |
| Eggerthella Genus probe          | lenta, sinensis                                                                                                                                                                                                                                                                                           |
| Enterococcus Genus probe 1       | durans, faecium                                                                                                                                                                                                                                                                                           |
| Enterococcus Genus probe 2       | italicus, saccharolyticus                                                                                                                                                                                                                                                                                 |
| Enterococcus Genus probe 3       | aquimarinus, avium, canintestini, casseliflavus, cecorum, dispar, durans, faecium, flavescens, gallinarum, hirae, italicus, malodoratus, pseudoavium, raffinosis, saccharolyticus, sulfureus, thailandicus                                                                                                |
| Erysipelothrichaceae Genus probe | sp. oral taxon 904, 905                                                                                                                                                                                                                                                                                   |
| Erysipelothrix Genus probe       | rhusiopathiae, tonsillarum                                                                                                                                                                                                                                                                                |
| Escherichia Genus probe          | albertii, coli, fergusonii                                                                                                                                                                                                                                                                                |
| Eubacterium Genus probe 1        | brachy, infirmum, saphenum, sulci                                                                                                                                                                                                                                                                         |
| Eubacterium Genus probe 2        | minutum, nodatum                                                                                                                                                                                                                                                                                          |
| Filifactor Genus probe           | alocis, villosus                                                                                                                                                                                                                                                                                          |
| Fretibacterium Genus probe 1     | sp. oral taxon 358, 453                                                                                                                                                                                                                                                                                   |

|                                 |                                                                                                                                                                                                                                                                     |
|---------------------------------|---------------------------------------------------------------------------------------------------------------------------------------------------------------------------------------------------------------------------------------------------------------------|
| Fretibacterium Genus probe 2    | sp. oral taxon 359, 452                                                                                                                                                                                                                                             |
| Fretibacterium Genus probe 3    | fastidiosum, sp. oral taxon 358, 359, 360, 361, 362, 452, 453                                                                                                                                                                                                       |
| Fusobacterium Genus probe 1     | naviforme, nucleatum subsp. fusiforme                                                                                                                                                                                                                               |
| Fusobacterium Genus probe 2     | naviforme, nucleatum subsp. animalis, nucleatum subsp. vincentii, sp. oral taxon 205                                                                                                                                                                                |
| Fusobacterium Genus probe 3     | canifelinum, nucleatum subsp. animalis, nucleatum subsp. nucleatum, nucleatum subsp. polymorphum, simiae, sp. oral taxon 203, 370                                                                                                                                   |
| Fusobacterium Genus probe 4     | canifelinum, naviforme, necrophorum, nucleatum subsp. animalis, nucleatum subsp. fusiforme, nucleatum subsp. nucleatum, nucleatum subsp. polymorphum, nucleatum subsp. vincentii, periodonticum, simiae, sp. oral taxon 203, sp. oral taxon 205, sp. oral taxon 370 |
| Gemella Genus probe             | asaccharolytica, bergeri, cuniculi, haemolysans, morbillorum, palaticanis, sanguinis                                                                                                                                                                                |
| Granulicatella Genus probe      | adiacens, paradiacens                                                                                                                                                                                                                                               |
| Haemophilus Genus probe 1       | aegyptius, influenzae                                                                                                                                                                                                                                               |
| Haemophilus Genus probe 2       | haemolyticus, sp. oral taxon 036                                                                                                                                                                                                                                    |
| Haemophilus Genus probe 3       | aegyptius, haemolyticus, influenzae, quentini, sp. oral taxon 036, 908                                                                                                                                                                                              |
| Helicobacter Genus probe        | acinonychis, apodemus, aurati, baculiformis, bizzozeronii, canadensis, cetorum, equorum, felis, ganmani, heilmannii, mesocricetorum, muricola, muridarum, mustelae, pullorum, pylori, rappini, salomonis, suis, trogontum, tursiopsae                               |
| Johnsonella Genus probe         | ignava, sp. oral taxon 166                                                                                                                                                                                                                                          |
| Kingella Genus probe 1          | denitrificans, sp. oral taxon 012                                                                                                                                                                                                                                   |
| Kingella Genus probe 2          | denitrificans, sp. oral taxon 012                                                                                                                                                                                                                                   |
| Kytococcus Genus probe          | aerolatus, sedentarius                                                                                                                                                                                                                                              |
| Lachnoanaerobaculum Genus probe | orale, saburreum                                                                                                                                                                                                                                                    |
| Lactobacillus Genus probe 1     | gasseri, johnsonii                                                                                                                                                                                                                                                  |
| Lactobacillus Genus probe 2     | animalis, apodemi, coleohominis, frumenti, murinus, panis, pontis, reuteri, ruminis, secaliphilus, vaginalis, sp. oral taxon 052                                                                                                                                    |
| Lactobacillus Genus probe 3     | antri, buchneri, casei, coryniformis, curvatus, diolivorans, farraginis, hilgardii, kefirii, kisonensis, oris, paracasei, parafarraginis, parakefirii, rapi, reuteri, rhamnosus, sakei, sunkii, vaginalis, zeae                                                     |
| Lactobacillus Genus probe 4     | acidophilus, crispatus, helveticus                                                                                                                                                                                                                                  |
| Lactobacillus Genus probe 5     | paraplantarum, pentosus, plantarum                                                                                                                                                                                                                                  |
| Leptotrichia Genus probe 1      | buccalis, sp. oral taxon 225                                                                                                                                                                                                                                        |
| Leptotrichia Genus probe 2      | hofstadii, sp. oral taxon 909                                                                                                                                                                                                                                       |
| Leptotrichia Genus probe 3      | buccalis, hofstadii, wadei, sp. oral taxon 225, 417, 462, 463, 909                                                                                                                                                                                                  |
| Leptotrichia Genus probe 4      | hongkongensis, shahii, trevisanii, sp. oral taxon 212, 215, 217, 223, 392, 879                                                                                                                                                                                      |

|                                |                                                                                                                                                                                                                                                                                                                                                                                                                                                                                      |
|--------------------------------|--------------------------------------------------------------------------------------------------------------------------------------------------------------------------------------------------------------------------------------------------------------------------------------------------------------------------------------------------------------------------------------------------------------------------------------------------------------------------------------|
| Leptotrichiaceae Genus probe   | sp. oral taxon 210, 220                                                                                                                                                                                                                                                                                                                                                                                                                                                              |
| Listeria Genus probe           | innocua, ivanovii subsp. ivanovii, ivanovii subsp. londoniensis, marthii, monocytogenes, seeligeri, welshimeri                                                                                                                                                                                                                                                                                                                                                                       |
| Lysinibacillus Genus probe     | boronitolerans, fusiformis, macroides, massiliensis, odysseyi, sphaericus, xylanilyticus                                                                                                                                                                                                                                                                                                                                                                                             |
| Mitsuokella Genus probe        | jalaludinii, multacida                                                                                                                                                                                                                                                                                                                                                                                                                                                               |
| Mobiluncus Genus probe         | curtisii subsp. curtisii, curtisii subsp. holmesii, mulieris                                                                                                                                                                                                                                                                                                                                                                                                                         |
| Mogibacterium Genus probe      | diversum, neglectum, pumilum, timidum, vescum                                                                                                                                                                                                                                                                                                                                                                                                                                        |
| Moraxella Genus probe 1        | catarrhalis, nonliquefaciens                                                                                                                                                                                                                                                                                                                                                                                                                                                         |
| Moraxella Genus probe 2        | bovis, bovoculi, caprae, catarrhalis, cuniculi, equi, lacunata, lincolonii, nonliquefaciens, oblonga, ovis                                                                                                                                                                                                                                                                                                                                                                           |
| Mycobacterium Genus probe      | aemonae, africanum, angelicum, arosiense, asiaticum, avium, bohemicum, caprae, chimaera, colombiense, conspicuum, gastrii, gordonae, haemophilum, intracellulare, kansasii, lacus, leprae, lepromatosis, malmoense, marinum, microti, nebraskense, paraffinicum, paratuberculosis, pinnipedii, pseudoshottsii, riyadhense, shottsii, szulgai, tuberculosis, ulcerans                                                                                                                 |
| Mycoplasma Genus probe         | alkalescens, anseris, arginini, arthritidis, auris, bovoculi, buccale, canadense, cloacale, coccoides, collis, columbinum, conjunctivae, cricetuli, dispar, equirhinis, falconis, faucium, flocculare, gateae, genitalium, gypis, haemocanis, haemofelis, hominis, hyopneumoniae, hyorhinis, hyosynoviae, iguanae, indiense, meleagridis, mobile, neurolyticum, orale, ovipneumoniae, phocicerebrale, phocidae, pneumoniae, salivarium, spumans, subdolum, timone, vulturii, zalophi |
| Neisseria Genus probe 1        | oralis, sp. oral taxon 016                                                                                                                                                                                                                                                                                                                                                                                                                                                           |
| Neisseria Genus probe 2        | bacilliformis, cinerea, dentiae, flava, flavescens, gonorrhoeae, iguanae, meningitidis, mucosa, oralis, pharyngis, polysaccharea, shayegani, sicca, subflava, wadsworthii, weaveri, sp. oral taxon 018, 020                                                                                                                                                                                                                                                                          |
| Olsenella Genus probe          | profusa, uli, sp. oral taxon 807                                                                                                                                                                                                                                                                                                                                                                                                                                                     |
| Oribacterium Genus probe       | sp. oral taxon 078, 372                                                                                                                                                                                                                                                                                                                                                                                                                                                              |
| Paenibacillus Genus probe      | abekawaensis, anaericanus, azoreducens, barengoltzii, borealis, brasiliensis, chibensis, cineris, cookii, durus, favisporus, fujiensis, ginsengisoli, graminis, illinoisensis, jamilae, lactis, macerans, nematophilus, odorifer, pabuli, peoriae, polymyxa, riograndensis, sanguinis, stellifer, xylanilyticus, sp. oral taxon 048, 786                                                                                                                                             |
| Parvimonas Genus probe         | micra, sp. oral taxon 110, 393                                                                                                                                                                                                                                                                                                                                                                                                                                                       |
| Peptoniphilus Genus probe      | asaccharolyticus, duerdenii, gorbachii, harei, indolicus, ivorii, lacrimalis, olsenii, sp. oral taxon 375, 386, 836                                                                                                                                                                                                                                                                                                                                                                  |
| Peptostreptococcus Genus probe | anaerobius, russellii, stomatis                                                                                                                                                                                                                                                                                                                                                                                                                                                      |



|                                     |                                                                                                                                                                                                                                                                                             |
|-------------------------------------|---------------------------------------------------------------------------------------------------------------------------------------------------------------------------------------------------------------------------------------------------------------------------------------------|
| Porphyromonas Genus probe 1         | circumdentaria, endodontalis, gingivicanis, sp. oral taxon 285, 395                                                                                                                                                                                                                         |
| Porphyromonas Genus probe 2         | catoniae, sp. oral taxon 277, 278, 284                                                                                                                                                                                                                                                      |
| Porphyromonas Genus probe 3         | asaccharolytica, uenonis                                                                                                                                                                                                                                                                    |
| Prevotella Genus probe 1            | nanceiensis, sp. oral taxon 299                                                                                                                                                                                                                                                             |
| Prevotella Genus probe 2            | buccae, buccalis, corporis, dentasini, denticola, loescheii,<br>maculosa, multiformis, oralis, oris, saccharolytica, shahii, sp. oral taxon 304, 317, 443, 472, 526, 820                                                                                                                    |
| Propionibacterium Genus probe       | acidifaciens, acidipropionici, acnes, australiense, avidum, freudenreichii, granulorum, jensenii, microaerophilum, propionicum, thoenii, sp. oral taxon 192, 193                                                                                                                            |
| Proteus Genus probe                 | mirabilis, penneri, vulgaris                                                                                                                                                                                                                                                                |
| Pseudomonas Genus probe             | aeruginosa, alcaliphila, anguilliseptica, cannabina, cedrina, cichorii, fluorescens, fragi, fuscovaginae, jessenii, mendocina, monteilii, mosselii, otitidis, panipatensis, plecoglossicida, poae, pseudoalcaligenes, putida, reactans, stutzeri, syringae, viridiflava, sp. oral taxon 032 |
| Rothia Genus probe                  | aeria, dentocariosa, mucilaginosus                                                                                                                                                                                                                                                          |
| Sanguibacter Genus probe            | inulinus, keddiei, suarezii                                                                                                                                                                                                                                                                 |
| Scardovia Genus probe               | inopinata, wiggisiae                                                                                                                                                                                                                                                                        |
| Selenomonas & Centipeda Genus probe | dianae, flueggei, infelix, noxia, periodontii, sp. oral taxon 126, 138, 140, 146, 388, 479, 481, 892                                                                                                                                                                                        |
| Selenomonas Genus probe 1           | noxia, sp. oral taxon 140                                                                                                                                                                                                                                                                   |
| Selenomonas Genus probe 2           | sputigena, sp. oral taxon 143                                                                                                                                                                                                                                                               |
| Slackia Genus probe                 | exigua, faecicanis, isoflavoniconvertens                                                                                                                                                                                                                                                    |
| Sphingomonas Genus probe            | aquatilis, dokdonensis, echinoides, insulae, melonis, mucosissima, oligophenolica, rhizogenes, yunnanensis, sp. oral taxon 003                                                                                                                                                              |
| SR1 Genus probe                     | SR1[G-1] sp. oral taxon 345, 874, 875                                                                                                                                                                                                                                                       |
| Staphylococcus Genus probe 1        | aureus, gallinarum                                                                                                                                                                                                                                                                          |
| Staphylococcus Genus probe 2        | pasteuri, warneri                                                                                                                                                                                                                                                                           |
| Staphylococcus Genus probe 3        | aureus, capitis, caprae, carnosus, cohnii, condimenti, devriesei, epidermidis, haemolyticus, hominis, pasteuri, piscifermentans, saprophyticus, warneri                                                                                                                                     |
| Streptococcus Genus probe 1         | gordonii, sanguinis                                                                                                                                                                                                                                                                         |
| Streptococcus Genus probe 2         | pneumoniae, pseudopneumoniae                                                                                                                                                                                                                                                                |
| Streptococcus Genus probe 3         | salivarius, vestibularis                                                                                                                                                                                                                                                                    |
| Streptococcus Genus probe 4         | australis, cristatus, infantis, mitis, mitis bv. 2, oligofermentans, oralis, parasanguinis, parasanguinis II, peroris, pneumoniae, pseudopneumoniae, salivarius, sinensis, vestibularis, sp. oral taxon 055, 056, 057, 058, 061, 064, 065, 066, 067, 068, 069, 070, 071, 074, 423, 431, 486 |

|                               |                                                                                                                                                                     |
|-------------------------------|---------------------------------------------------------------------------------------------------------------------------------------------------------------------|
| Tannerella Genus probe        | forsythia, sp. oral taxon 286, 808, 916                                                                                                                             |
| TM7 Genus probe               | [G-1] sp. oral taxon 346, 347, 348, 349, 352, 353, 488, [G-2] sp. oral taxon 350, [G-3] sp. oral taxon 351, [G-4] sp. oral taxon 355, [G-5] sp. oral taxon 356, 437 |
| Treponema Genus probe 1       | sp. oral taxon 231, 237                                                                                                                                             |
| Treponema Genus probe 2       | medium, vincentii, sp. oral taxon 226, 228, 230, 231, 234, 235, 236, 237, 238                                                                                       |
| Treponema Genus probe 3       | denticola, putidum, sp. oral taxon 246, 247, 249                                                                                                                    |
| Treponema Genus probe 4       | sp. oral taxon 250, 251, 252, 253, 254, 255, 256, 508, 517, 518                                                                                                     |
| Treponema Genus probe 5       | azotonutricium, caldarium, lecithinolyticum, maltophilum, primitia, zuelzeriae, sp. oral taxon 258, 260, 490                                                        |
| Treponema Genus probe 6       | socranskii subsp. buccale, socranskii subsp. pedis, socranskii subsp. socranskii, sp. oral taxon 268, 269                                                           |
| Veillonella Genus probe 1     | atypica, dispar                                                                                                                                                     |
| Veillonella Genus probe 2     | atypica, caviae, criceti, dentocariosi, dispar, montpellierensis, parvula, ratti, rodentium, rogosae, sp. oral taxon 780, 917                                       |
| Veillonellaceae Genus probe 1 | sp. oral taxon 132, 150                                                                                                                                             |
| Veillonellaceae Genus probe 2 | sp. oral taxon 129, 132, 150, 918                                                                                                                                   |
| Veillonellaceae Genus probe 3 | sp. oral taxon 135, 145, 148, 155, 483                                                                                                                              |
| Yersinia Genus probe          | frederiksenii, pestis, pseudotuberculosis, similis                                                                                                                  |

Table lists a total of 129 genus-specific probes; not all species are found in the human oral cavity. Probes shaded green were detected in our study.

S5. Distribution of the 20 most frequent taxa among the PF samples of children who changed caries status from CF to CA after 12-months.

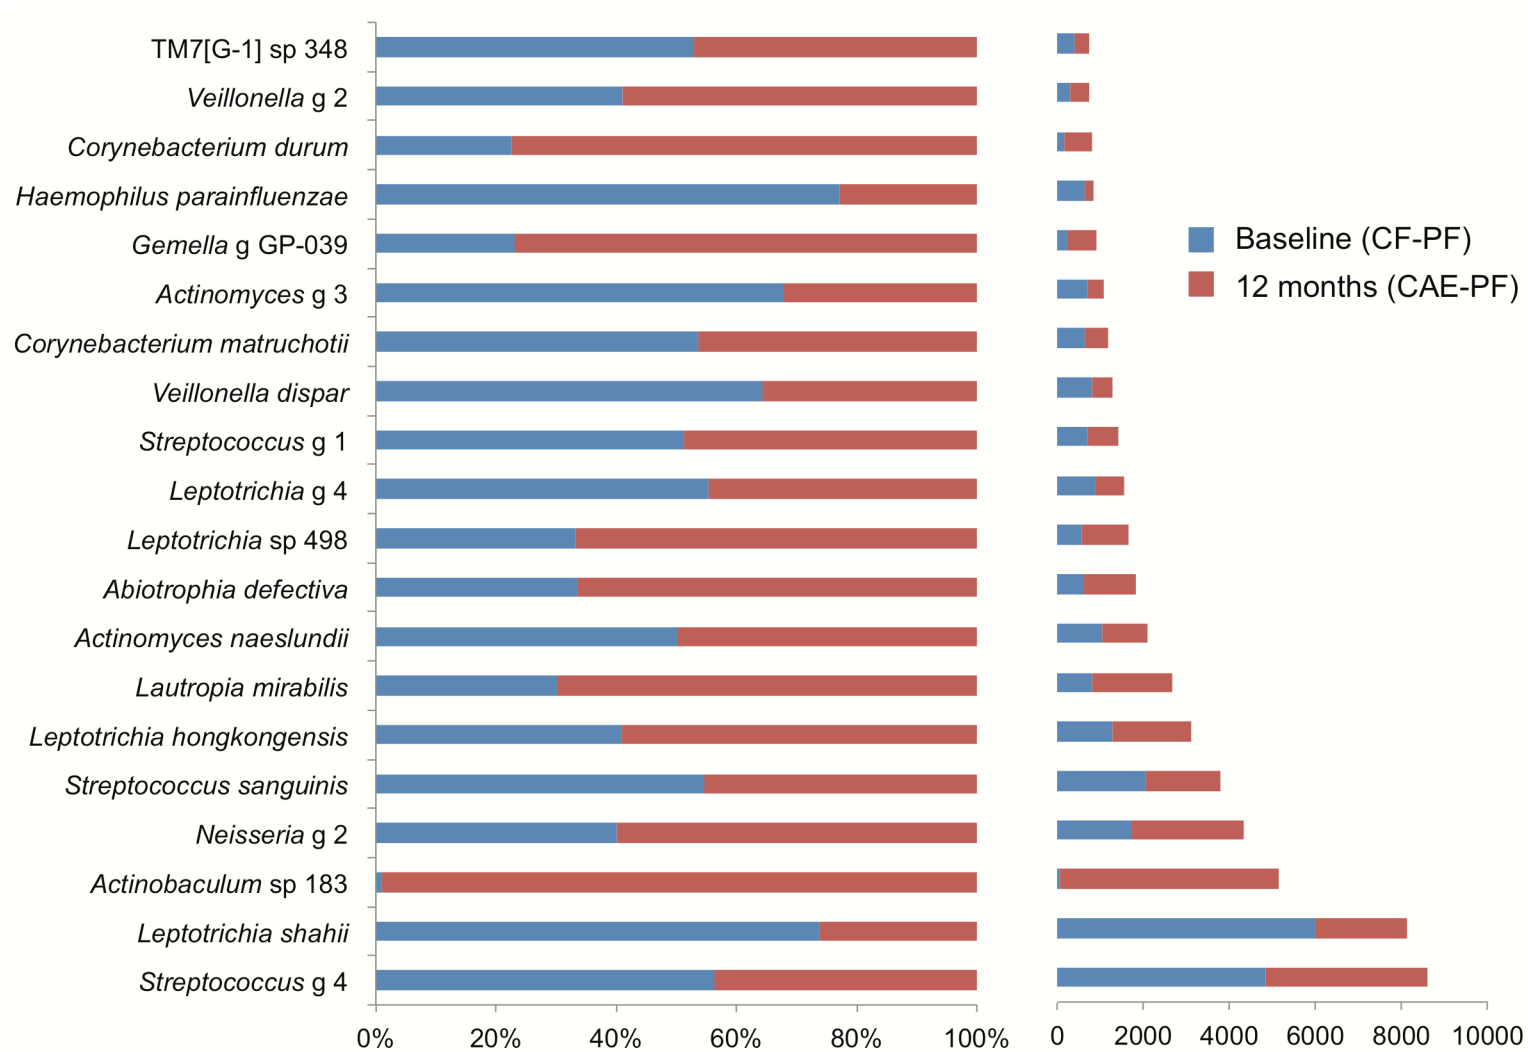

Supplement: IAI.00106-17_zii999092088s1.pdf [file IAI.00106-17_zii999092088s1.pdf]
